# Supplementary material for: Decreased quality of life and treatment satisfaction in patients with latent autoimmune diabetes of the adult
Source: PubMed Central journal article supplement (PMC5650726; doi:10.7717/peerj.3928), 2017-10-18
Supplement: peerj-05-3928-s001.pdf [file peerj-05-3928-s001.pdf]

# ADDQoL

Este cuestionario pregunta sobre su calidad de vida – en otras palabras, qué tan buena o mala siente que es su vida.

Por favor, ponga una “X” en el cuadrado que mejor describa su respuesta para cada pregunta.

Lo que queremos saber es cómo se siente con su vida actualmente.

I) En general, mi calidad de vida actual es:

|                          |                          |                          |                          |                          |                          |                          |
|--------------------------|--------------------------|--------------------------|--------------------------|--------------------------|--------------------------|--------------------------|
| <input type="checkbox"/> | <input type="checkbox"/> | <input type="checkbox"/> | <input type="checkbox"/> | <input type="checkbox"/> | <input type="checkbox"/> | <input type="checkbox"/> |
| excelente                | muy buena                | buena                    | ni buena ni mala         | mala                     | muy mala                 | extremadamente mala      |

Ahora nos gustaría saber cómo su calidad de vida es afectada por la diabetes, su manejo (incluyendo medicamentos, visitas al médico y comida) y cualquier complicación que pueda tener.

II) Si yo **no** tuviera diabetes, mi calidad de vida sería:

|                          |                          |                          |                          |                          |
|--------------------------|--------------------------|--------------------------|--------------------------|--------------------------|
| <input type="checkbox"/> | <input type="checkbox"/> | <input type="checkbox"/> | <input type="checkbox"/> | <input type="checkbox"/> |
| muchísimo mejor          | mucho mejor              | un poco mejor            | la misma                 | peor                     |

This copy is for information only - for use, please contact Professor Bradley

**Por favor, responda a las preguntas más específicas en las páginas siguientes. Para cada aspecto de vida descrito, encontrará dos partes:**

Para la parte (a): ponga una "X" en el cuadrado para demostrar cómo la diabetes afecta este aspecto de su vida;

Para la parte (b): ponga una "X" en el cuadrado para indicar lo importante que es este aspecto de la vida en su calidad de vida.

|   |                                                                                       |                          |                          |                          |                          |                          |
|---|---------------------------------------------------------------------------------------|--------------------------|--------------------------|--------------------------|--------------------------|--------------------------|
| 1 | (a) Si yo <u>no</u> tuviera diabetes, disfrutaría de mis actividades de tiempo libre: | <input type="checkbox"/> | <input type="checkbox"/> | <input type="checkbox"/> | <input type="checkbox"/> | <input type="checkbox"/> |
|   |                                                                                       | muchísimo más            | mucho más                | un poco más              | igual                    | menos                    |
|   | (b) Mis actividades de tiempo libre son:                                              | <input type="checkbox"/> | <input type="checkbox"/> | <input type="checkbox"/> | <input type="checkbox"/> |                          |
|   |                                                                                       | muy importantes          | importantes              | algo importantes         | nada importantes         |                          |

|   |                                                                                                                                                                                         |                          |                          |                          |                          |                          |
|---|-----------------------------------------------------------------------------------------------------------------------------------------------------------------------------------------|--------------------------|--------------------------|--------------------------|--------------------------|--------------------------|
| 2 | ¿Está usted trabajando actualmente, buscando trabajo o le gustaría trabajar?                                                                                                            | <input type="checkbox"/> | <input type="checkbox"/> | <input type="checkbox"/> | <input type="checkbox"/> | <input type="checkbox"/> |
|   | Sí <input type="checkbox"/> Si la respuesta es <b>sí</b> , complete (a) y (b).<br>No <input type="checkbox"/> Si la respuesta es <b>no</b> , pase directamente a la <b>Pregunta 3</b> . |                          |                          |                          |                          |                          |
|   | (a) Si yo <u>no</u> tuviera diabetes, mi vida de trabajo sería:                                                                                                                         | <input type="checkbox"/> | <input type="checkbox"/> | <input type="checkbox"/> | <input type="checkbox"/> | <input type="checkbox"/> |
|   |                                                                                                                                                                                         | muchísimo mejor          | mucho mejor              | un poco mejor            | igual                    | peor                     |
|   | (b) Para mí, tener una vida de trabajo es:                                                                                                                                              | <input type="checkbox"/> | <input type="checkbox"/> | <input type="checkbox"/> | <input type="checkbox"/> |                          |
|   |                                                                                                                                                                                         | muy importante           | importante               | algo importante          | nada importante          |                          |

|   |                                                                          |                          |                          |                          |                          |                          |
|---|--------------------------------------------------------------------------|--------------------------|--------------------------|--------------------------|--------------------------|--------------------------|
| 3 | (a) Si yo <u>no</u> tuviera diabetes, los viajes cortos o largos serían: | <input type="checkbox"/> | <input type="checkbox"/> | <input type="checkbox"/> | <input type="checkbox"/> | <input type="checkbox"/> |
|   |                                                                          | muchísimo más fáciles    | mucho más fáciles        | un poco más fáciles      | iguales                  | más difíciles            |
|   | (b) Para mí, los viajes cortos o largos son:                             | <input type="checkbox"/> | <input type="checkbox"/> | <input type="checkbox"/> | <input type="checkbox"/> |                          |
|   |                                                                          | muy importantes          | importantes              | algo importantes         | nada importantes         |                          |

**This copy is for information only - for use, please contact Professor Bradley**
