# Supplementary material for: Decreased quality of life and treatment satisfaction in patients with latent autoimmune diabetes of the adult
Source: PubMed Central journal article supplement (PMC5650726; doi:10.7717/peerj.3928), 2017-10-18
Supplement: peerj-05-3928-s002.pdf [file peerj-05-3928-s002.pdf]

## Questionario de Satisfacción con el Tratamiento para la Diabetes: DTSQs

Las siguientes preguntas están relacionadas con el tratamiento de su diabetes (incluyendo insulina, comprimidos y/o dieta) y su experiencia en estas últimas semanas. Por favor conteste a cada pregunta haciendo un círculo en un número de cada una de las escalas.

1. ¿En qué medida está Vd. satisfecho/a con su tratamiento actual?

muy satisfecho/a      6    5    4    3    2    1    0      muy insatisfecho/a

2. Últimamente, ¿con qué frecuencia ha considerado que su nivel de azúcar en la sangre era inaceptablemente alto?

la mayoría del tiempo      6    5    4    3    2    1    0      nunca

For information only

**This copy is for information only - for use, please contact Professor Bradley**

DTSQs © Prof Clare Bradley 9/93. Spanish for Spain 30.4.03 (from standard UK English rev. 7/94)

Health Psychology Research, Dept of Psychology, Royal Holloway, University of London, Egham, Surrey, TW20 0EX, UK.
