# Supplementary material for: Decreased quality of life and treatment satisfaction in patients with latent autoimmune diabetes of the adult
Source: PeerJ. 2017 Oct 18;5:e3928. doi: 10.7717/peerj.3928 (PMC5650726; doi:10.7717/peerj.3928)
Supplement: Supplemental Information 1 — Clinical and demographic variables with quality of life and treatment satisfaction. [file peerj-05-3928-s007.xlsx]

## Sheet: Raw_data
																								ADDQoL-19				DTSQ-s
Code	Diabetes type	Group	Age	Gender	Education level	Smoking	Physical activity	Diabetes duration	Diabetic retinopathy	Hypertension	Dyslipidemia	Waist	BMI	SBP	DBP	hba1c	Total colesterol	HDL-c	Triglycerides	LDL-c	Insulin treatment	Microalbuminuria		X00	X01	total1		dtsq2	dtsq3	total2
		2:LADA; 1:T1DM; 0:T2DM	(years)	0:M; 1:F				(years)		0: No; 1:Yes	0: No; 1:Yes	(cms)	(Kg/m2)	(mmHg)	(mmHg)	(%)	(mg/dL)	(mg/dL)	(mg/dL)	(mg/dL)	0: No; 1:Yes	0: No; 1:Yes		Present QoL	Diabetes specific QoL	Average weighted impact score		Hyperglycaemia frequency perception	Hypoglycaemia frequency perception	Final score
1531	LADA	2	76	1	Primary	Former smoker	Regular physical activity	36.64	DR	1	1	100	27.9696	154	67	6.4	228	68	97	140.6	1	0		0	-3	-5.29412		5	2	27
1532	LADA	2	64	0	Primary	Current smoker	Regular physical activity	10.64	No DR	1	1	86	23.8899	129	51	7.6	251	45	195	167	1	1		-3	-3	-4		4	3	24
1533	LADA	2	35	1	Primary	Former smoker	Regular physical activity	8.64	No DR	0	0	63	20.7031	115	69	7.2	157	71	59	74.2	1	0		2	0	-1.42105		1	2	31
1534	LADA	2	73	1	Secondary	Non smoker	Sedentary	22.64	DR	1	1	124	40.9007	180	100	8	172	35	334	112	1	0		1	-2	-4		3	0	23
1535	LADA	2	59	0	Secondary	Non smoker	Sedentary	16.66	DR	1	1	112.3	32.7919	140	75	6.7	135	48	83	70.4	1	1		-1	-2	-3		4	1	31
1537	LADA	2	74	0	Primary	Former smoker	Regular physical activity	16.67	DR	1	1	102.7	28.5965	124	68	7.6	180	65	92	96.6	1	0		1	0	0		5	6	28
1538	LADA	2	71	1	Secondary	Non smoker	Sedentary	6.68	No DR	1	1	98	23.4602	178	91	8.7	180	34	316	123	1	0		1	-1	-0.133333		5	0	25
1539	LADA	2	54	0	< Primary	Former smoker	Regular physical activity	17.68	DR	1	1	108.2	32.9287	166	93	7.3	122	35	94	68.2	1	1		-1	-2	-5.52941		4	2	16
1540	LADA	2	75	1	Primary	Non smoker	Sedentary	33.68	DR	1	1	93	22.7732	171	51	7	241	83	91	139.8	1	0		-2	-2	-1.5		5	1	23
1541	LADA	2	61	1	Primary	Non smoker	Regular physical activity	20.69	DR	0	1	88	26.2222	145	45	7.5	239	91	53	137.4	1	0		0	-1	-0.944444		4	1	33
1542	LADA	2	68	1	Primary	Non smoker	Regular physical activity	9.7	No DR	1	1	98	27.2874	152	85	8.3	160	72	53	77.4	1	0		0	-2	-3.3125		5	3	21
1543	LADA	2	55	1	Primary	Non smoker	Regular physical activity	4.71	No DR	0	0	74	23.3778	107	70	6.6	252	70	67	168.6	1	1		1	-2	-1.22222		3	3	29
1544	LADA	2	66	1	Primary	Non smoker	Regular physical activity	7.73	No DR	0	1	76	23.9361	132	77	8.2	216	77	56	127.8	1	0		0	0	-2.05556		4	4	18
1545	LADA	2	69	0	Primary	Former smoker	Regular physical activity	33.73	DR	0	1	94.5	26.3465	120	80	7.8	240	74	96	146.8	1	0		1	-3	-4.11765		4	4	15
1546	LADA	2	36	0	Graduate or higher	Current smoker	Sedentary	8.57	No DR	0	1	102.5	28.4386	120	80	8	165	39	131	99.8	1	0		1	0	-2.05263		6	1	21
1547	LADA	2	71	0	Primary	Current smoker	Regular physical activity	10.5	No DR	1	1	108	31.0477	147	73	6.4	197	67	54	119.2	1	1		-1	-2	-2.11765		4	1	16
1548	LADA	2	64	1	< Primary	Non smoker	Regular physical activity	14.84	No DR	0	1	84	27.3258	128	84	8.7	204	76	67	114.6	1	0		0	-1	-2.1875		4	1	24
1549	LADA	2	53	0	Secondary	Former smoker	Regular physical activity	2.76	No DR	0	1	92.5	26.1551	130	70	6.1	138	46	70	78	1	0		1	0	-0.578947		2	5	30
1550	LADA	2	70	1	Primary	Non smoker	Sedentary	16.77	No DR	1	0	106	34.0444	170	68	8.2	211	46	180	129	1	1		1	-1	-0.470588		5	1	31
1552	LADA	2	57	0	Graduate or higher	Non smoker	Regular physical activity	2.12	No DR	0	0	77	23.391	129	74	5.7	202	72	35	123	1	0		2	0	-0.555556		2	2	30
1553	LADA	2	54	1	Secondary	Current smoker	Sedentary	10.79	No DR	1	1	91	27.5452	107	73	7.3	153	40	109	91.2	1	0		1	-2	-2.47368		1	1	23
1554	LADA	2	53	1	Secondary	Former smoker	Regular physical activity	9.81	No DR	0	0	72.5	26.1719	123	74	7.8	233	63	75	155	1	0		1	-2	-2		6	5	21
1555	LADA	2	58	0	Primary	Current smoker	Regular physical activity	12.81	No DR	1	1	99.5	29.1871	130	70	9.7	155	41	141	85.8	1	0		1	-2	-0.588235		3	0	19
1556	LADA	2	34	0	Graduate or higher	Non smoker	Regular physical activity	2.91	No DR	1	0	83	24.2513	121	68	6	176	59	54	106.2	1	0		2	0	-1		1	0	28
1557	LADA	2	53	1	Secondary	Current smoker	Regular physical activity	3.83	No DR	0	1	76	21.0925	113	67	6.1	200	67	76	117.8	0	0		2	0	-0.105263		3	0	35
1558	LADA	2	72	1	Primary	Non smoker	Regular physical activity	14.83	No DR	1	0	96	26.9982	141	61	7.3	177	41	146	106.8	1	0		0	-2	-2.11765		4	1	27
1559	LADA	2	70	0	Secondary	Non smoker	Regular physical activity	11.92	No DR	0	1	101	31.1199	180	84	7.9	181	62	79	103.2	1	1		0	-1	-1.25		4	3	31
1560	LADA	2	73	0	Primary	Non smoker	Regular physical activity	26.77	No DR	1	1	81	22.6883	118	69	6.8	163	69	76	78.8	1	0		0	-2	-3.38889		4	4	29
1564	LADA	2	80	1	< Primary	Non smoker	Sedentary	18.98	DR	1	0	91	26.0953	135	66	7.1	196	77	83	102.4	1			0	-2	-3		5	3	32
1571	LADA	2	36	0	Secondary	Current smoker	Regular physical activity	4.19	No DR	0	1	84	21.649	117	70	7.4	148	50	51	87.8	1	0		1	-1	-0.315789		3	2	23
1576	LADA	2	74	0	Secondary	Former smoker	Sedentary	9.98	No DR	1	1	108	28.5705	148	79	7	180	65	109	93.2	0	0		2	0	0		3	3	25
1579	LADA	2	52	0	Primary	Current smoker	Sedentary	8.89	No DR	1	0	123.5	38.2682	141	88	7	180	34	162	113.6	1	0		0	-1	-0.421053		2	0	31
1591	LADA	2	69	0	Primary	Non smoker	Regular physical activity	16.85	No DR	0	1	96	26.5696	136	79	6.9	158	43	94	96.2	1	0		2	0	-0.277778		5	1	36
1593	LADA	2	62	1	Primary	Non smoker	Regular physical activity	15.94	No DR	1	1	102.4	33.8902	196	77	9.5	157	73	53	73.4	1	0		0	-2	-0.941176		3	2	19
1595	LADA	2	45	0	Secondary	Non smoker	Sedentary	5.79	No DR	0	1	110	30.3345	126	76	9	155	39	122	91.6	1	0		-1	-2	-3.82353		6	1	22
1598	LADA	2	69	1	Primary	Non smoker	Sedentary	5.93	No DR	1	1	142.5	48.4301	130	70	7.1	131	39	129	66.2	0	1		0	-1	-1.16667		4	0	25
1599	LADA	2	53	0	Secondary	Former smoker	Regular physical activity	10.95	No DR	0	0	95	23.1241	109	73	7.6	214	48	100	146	1	0		1	-1	-1.57895		4	1	23
1600	LADA	2	56	0	Secondary	Current smoker	Regular physical activity	11.98	No DR	1	1	109	29.2245	129	75	6.1	149	25	412	97	1	1		1	-1	-0.736842		3	0	34
1601	LADA	2	62	0	Primary	Non smoker	Sedentary	2.99	No DR	0	1	103.5	30.6748	148	82	7.3	167	63	80	88	1	0		1	0	-0.555556		3	1	33
1602	LADA	2	71	1	Primary	Non smoker	Regular physical activity	4.81	No DR	0	0	79	21.1884	134	73	8.8	197	78	64	106.2	1	0		-1	-3	-2.33333		3	1	24
1605	LADA	2	59	0	Secondary	Former smoker	Regular physical activity	18.31	No DR	1	1	103.2	29.2357	120	70	5.3	139	33	246	56.8	1	0		1	-1	-0.611111		4	1	14
1606	LADA	2	73	1	Secondary	Current smoker	Regular physical activity	8.31	No DR	0	0	95.5	25.8488	140	77	8.2	166	81	94	66.2	1	0		1	-2	-0.375		3	0	22
1607	LADA	2	68	0	Primary	Non smoker	Regular physical activity	7.77	No DR	0	1		25.7572	125	69	9.6	189	55	66	120.8	1	0		0	-1	-0.210526		4	1	22
1608	LADA	2	53	0	Secondary	Current smoker	Regular physical activity	2.83	DR	0	0	104	31.8236			5.3	213	33	412	164	0	0		1	0	0		3	3	23
1609	LADA	2	62	0	Secondary	Former smoker	Regular physical activity	15.87	DR	1	1	130	37.0583	137	69	9.1	134	36	175	63	0	1		1	0	-1.05556		3	0	23
1610	LADA	2	67	1	Primary	Former smoker	Regular physical activity	15.53	No DR	1	1	102	27.5982	136	77	8.6	145	41	145	75	1	0		0	-1	-0.733333		4	4	31
1611	LADA	2	43	0	Secondary	Non smoker	Regular physical activity	5.89	No DR	0	0	91.5	26.859	139	75	8.2	155	59	49	86.2	1	0		1	-1	-1.23529		4	3	25
1612	LADA	2	59	1	Primary	Former smoker	Regular physical activity	24.96	No DR	1	1	85	24.1103	152	88	7.7	164	58	86	88.8	1	1		1	0	0		4	3	29
1	T2DM	0	72	1	Primary	Former smoker	Sedentary	20	DR	1	1	110	34.97	182	89	9.9	170	50	167	86.6	1	1		0	-2	-0.75		2	6	15
2	T2DM	0	49	0	Primary	Non smoker	Sedentary	6	DR	1	0	103	35.8	145	85	7.7	142	44	99	78.2	0	0		1	0	-0.111111		6	0	33
3	T2DM	0	64	0	Primary	Former smoker	Sedentary	5	DR	1	1		35.61	159	69	5.4	158	70	63	75.4	0	1		1	-1	-0.222222		0	0	24
4	T2DM	0	61	1	Primary	Non smoker	Regular physical activity	3	DR	1	1	87	28.88	145	77	7.3	131	50	90	63	0	0		0	-1	-0.5		1	0	33
5	T2DM	0	62	0	< Primary	Current smoker	Sedentary	1	DR	0	1	104	28.1	173	96	8	163	41	341	69	0	1		0	-1	-1.36842		4	0	23
6	T2DM	0	57	1	Primary	Non smoker	Regular physical activity	2	DR	0	0	104	31.12	198	87	6.4	216	54	131	135.8	0	1		0	-1	-0.5625		1	0	33
7	T2DM	0	56	0	< Primary	Non smoker	Sedentary	10	DR	1	0	98	28.12	157	89	7.4	239	70	115	146	1	1		-3	-3	-3		5	6	26
8	T2DM	0	48	0	Secondary	Current smoker	Regular physical activity	3	DR	0	0	86	24.87	128	79	6.8	195	72	65	110	0	0		1	1	-0.31579		0	0	29
9	T2DM	0	63	0	Primary	Former smoker	Sedentary	21	DR	1	0	100	26.67	180	90	7.9	117	47	91	51.8	1	0		1	-2	-6.5		3	1	25
10	T2DM	0	67	0	Primary	Former smoker	Regular physical activity	5	DR	0	0	116	32.08	133	66	9.3	76	37	81	22.8	0	0		0	2	-1.88235		6	0	24
11	T2DM	0	65	0	Primary	Former smoker	Regular physical activity	10	DR	1	1	103	28.03	148	77	6.5	140	47	63	80.4	1	0		1	-2	-2.21053		1	2	26
15	T2DM	0	50	0	Primary	Current smoker	Regular physical activity	10	DR	0	0	101	28.27	126	73	8.7	188	41	139	119.2	0	0		1	0	-0.578947		6	0	23
16	T2DM	0	63	0	Primary	Non smoker	Regular physical activity	23	DR	1	0	109	30.16	150	85	8.4	194	53	100	121	1	0		2	-2	-0.166667		1	0	24
18	T2DM	0	60	0	Secondary	Former smoker	Regular physical activity	10	No DR	0	0	109	32.38	125	65	6	161	44	73	102.4	1	0		1	-2	-4.35294		1	2	25
19	T2DM	0	62	0	Graduate or higher	Former smoker	Sedentary	2	No DR	1	1	106	30.57	121	71	7.3	175	47	109	106.2	0	0		1	0	-0.157895		2	0	21
20	T2DM	0	56	0	Secondary	Former smoker	Sedentary	1	DR	1	1	108	28.52	168	100	7.8	168	49	49	109.2	1	0		0	-2	-1.05882		4	1	33
21	T2DM	0	62	1	< Primary	Non smoker	Regular physical activity	14	No DR	0	1	108	30.83	120	68	6.5	188	50	131	111.8	0	0		0	0	-0.0625		0	0	24
23	T2DM	0	59	0	Primary	Non smoker	Regular physical activity	2	No DR	1	1	88	27.59	147	88	6.5	126	46	105	59	0	0		1	0	0		0	0	26
24	T2DM	0	69	0	Primary	Former smoker	Regular physical activity	25	No DR	0	0	102	28.59	149	77	8.8	166	47	119	95.2	0	0		1	1	-0.0625		1	0	26
25	T2DM	0	72	0	Primary	Non smoker	Regular physical activity	2	No DR	1	0	92	25.4	151	78	7.4	203	59	73	129.4	0	0		1	0	0		0	0	35
29	T2DM	0	49	0	Primary	Former smoker	Sedentary	6	No DR	1	1	124	35.4	123	84	10.5	152	29	355	68	0	0		-2	-1	-2.31579		6	0	23
31	T2DM	0	60	0	Secondary	Current smoker	Sedentary	4	No DR	0	0	102	28.53	126	74	7.6	119	48	69	57.2	0	0		1	0	-0.105263		0	0	30
32	T2DM	0	56	0	Primary	Former smoker	Regular physical activity	5	DR	1	1	97	27.85	141	64	6.9	162	55	138	79.4	0	0		1	-2	-1.11111		3	2	24
33	T2DM	0	49	1	Secondary	Former smoker	Regular physical activity	2	No DR	0	1	90	26.56	122	85	8.1	183	58	112	102.6	0	0		1	-1	-0.684211		2	0	25
34	T2DM	0	54	0	Primary	Non smoker	Regular physical activity	5	DR	1	0	119	34.61	168	100	9.6	140	45	83	78.4	0	1		1	-1	-0.9375		5	1	26
36	T2DM	0	69	1	Primary	Non smoker	Regular physical activity	8	No DR	0	1	116	35.09	154	95	10.6	167	32	409	67	1	0		0	-1	-0.777778		2	2	27
37	T2DM	0	64	0	Primary	Former smoker	Regular physical activity	15	No DR	0	0	95	24.96	133	80	8.3	116	40	89	58.2	0	0		0	-2	-0.157895		5	0	29
38	T2DM	0	67	0	Secondary	Former smoker	Regular physical activity	25	No DR	1	1	87	24.24	129	70	7.2	148	48	75	85	0	0		2	0	0		0	0	30
39	T2DM	0	51	0	Graduate or higher	Former smoker	Sedentary	10	No DR	1	1	90	27.08	117	84	6.7	156	36	114	97.2	0	0		1	0	-0.0526316		1	0	25
40	T2DM	0	64	0	Secondary	Former smoker	Regular physical activity	22	DR	1	0	97	32.19	150	55	7.3	166	37	98	109.4	1	1		0	-2	-1.44444		1	4	24
41	T2DM	0	74	1	Primary	Non smoker	Regular physical activity	5	No DR	1	1	92	27.53	141	69	6.2	165	70	59	83.2	0	0		0	0	-0.4		4	0	32
42	T2DM	0	68	0	Secondary	Non smoker	Sedentary	4	No DR	0	0	95	29.79	148	90	10.3	151	39	109	90.2	0	0		1	0	0.31579		5	1	29
44	T2DM	0	60	0	Graduate or higher	Former smoker	Regular physical activity	10	No DR	1	0	97	26.06	121	68	7.2	183	46	167	103.6	0	0		2	-1	-0.105263		6	1	22
45	T2DM	0	73	1	Primary	Non smoker	Regular physical activity	10	No DR	0	0	100	28.16	100	60	8.6	180	51	99	109.2	0	0		1	0	-0.5		6	0	21
47	T2DM	0	50	1	Primary	Current smoker	Sedentary	7	No DR	0	1	97	34.74	123	80	6.4	231	35	315	136	0	0		1	0	-0.277778		3	0	26
48	T2DM	0	67	1	Secondary	Non smoker	Sedentary	10	No DR	0	0	94	29.95	128	84	6.9	186	39	291	112	0	0		0	0	-0.0666667		3	0	30
49	T2DM	0	43	0	Graduate or higher	Former smoker	Sedentary	5	No DR	0	0	84	26.99	116	64	8.3	119	57	38	54.4	0	0		0	-1	-1.52632		6	0	23
50	T2DM	0	57	0	Graduate or higher	Former smoker	Sedentary	4	No DR	1	0	109	34.02	132	83	10.4	218	40	166	144.8	0	0		2	0	-0.894737		5	2	20
51	T2DM	0	49	1	Graduate or higher	Former smoker	Regular physical activity	4	No DR	0	0	72	25	113	65	5.8	191	52	46	129.8	1	0		1	-1	-1.31579		6	1	22
52	T2DM	0	70	1	Secondary	Non smoker	Regular physical activity	15	No DR	0	0	88	25.54	150	88	9.2	196	40	187	118.6	0	0		2	0	-0.0526316		3	0	35
54	T2DM	0	59	1	Primary	Non smoker	Regular physical activity	10	No DR	0	1	97	37.61	145	75	7.1	162	60	78	86.4	0	0		1	0	0		1	2	24
55	T2DM	0	45	1	Primary	Non smoker	Regular physical activity	3	No DR	0	0	92	29.09	141	81	7	176	64	72	97.6	0	0		0	1	-1.26316		2	0	35
56	T2DM	0	69	1	Primary	Current smoker	Sedentary	4	No DR	0	0	89	25.15	128	71	7.8	223	81	77	126.6	1	0		1	-1	-0.117647		2	3	12
57	T2DM	0	64	1	Primary	Non smoker	Sedentary	6	No DR	0	1	112	41.09	138	79	10.2	160	44	122	91.6	1	0		-1	-1	-0.578947		5	0	25
58	T2DM	0	61	0	Primary	Former smoker	Regular physical activity	5	No DR	1	1	132	35.73	162	97	7	173	49	98	104.4	0	0		1	0	0		1	1	35
60	T2DM	0	64	0	Primary	Non smoker	Sedentary	29	DR	1	1	104	28.9	174	90	8.7	154	38	172	81.6	1	0		2	0	-0.421053		2	2	22
61	T2DM	0	74	0	Graduate or higher	Former smoker	Sedentary	1	No DR	0	1	116	37.64	139	80	6.9	173	61	134	85.2	0	0		2	0	0		6	0	18
62	T2DM	0	57	0	Primary	Former smoker	Sedentary	13	No DR	0	0	98	27.95	140	81	7.4	184	55	49	119.2	0	0		1	-1	0		5	0	36
64	T2DM	0	73	1	< Primary	Non smoker	Sedentary	10	No DR	1	1	101	32.62	134	51	7.1	184	58	111	103.8	0	0		0	0	0		1	0	21
67	T2DM	0	70	1	Primary	Non smoker	Sedentary	10	No DR	1	1	103	30.79	167	80	7.9	207	46	200	121	0	0		-1	0	-0.25		2	0	16
69	T2DM	0	62	0	Secondary	Former smoker	Regular physical activity	6	No DR	1	1	101	29.41	149	79	7.8	119	30	93	70.4	0	0		2	0	-0.333333		4	5	26
70	T2DM	0	60	0	Secondary	Former smoker	Regular physical activity	2	No DR	0	1	95	30.1	132	74	7.3	171	38	121	108.8	0	0		2	0	-1.16667		0	0	23
73	T2DM	0	66	0	Primary	Former smoker	Regular physical activity	12	DR	1	0	96	25.03	142	78	7.1	204	38	130	140	1	1		1	0	-1.35294		5	0	27
75	T2DM	0	62	0	Primary	Former smoker	Regular physical activity	5	No DR	1	1	87	23.95	155	81	7.7	184	45	155	108	0	0		3	-1	-0.0526316		2	0	26
77	T2DM	0	49	0	Primary	Non smoker	Sedentary	8	No DR	0	1	99	28.73	141	88	9.1	199	42	208	115.4	0	0		1	-1	-1.88235		0	2	19
78	T2DM	0	74	0	Graduate or higher	Non smoker	Regular physical activity	3	No DR	0	0	92	23.56	135	77	6.3	219	54	122	140.6	0	0		0	0	-0.111111		1	0	28
81	T2DM	0	74	1	< Primary	Non smoker	Regular physical activity	3	No DR	0	0	117	32.66	146	72	6.3	174	48	60	114	0	0		0	-1	-0.75		0	0	23
83	T2DM	0	60	0	Secondary	Current smoker	Sedentary	4	No DR	1	1	108	29.64	144	74	8	108	31	92	58.6	0	0		0	0	-0.631579		6	0	19
84	T2DM	0	47	0	Graduate or higher	Current smoker	Regular physical activity	3	No DR	0	1	98	27.83	149	79	6.3	165	47	61	105.8	0	0		3	0	-0.210526		0	0	30
86	T2DM	0	60	0	Secondary	Former smoker	Regular physical activity	12	No DR	1	1	83	23.05	133	81	8.2	227	33	190	156	0	0		1	-1	-0.0526316		1	0	26
87	T2DM	0	51	0	Graduate or higher	Former smoker	Regular physical activity	8	No DR	0	0	98	27.07	132	96	6.8	240	42	334	141	0	0		1	0	-0.105263		2	6	30
88	T2DM	0	57	0	Graduate or higher	Former smoker	Regular physical activity	3	No DR	1	0	99	26.01	123	65	6.5	166	36	182	93.6	0	0		0	-2	-1.10526		0	0	26
89	T2DM	0	65	0	Primary	Former smoker	Sedentary	7	No DR	1	0	109	33.07	132	81	8.7	164	55	63	96.4	0	0		0	-1	-0.263158		6	0	23
90	T2DM	0	45	0	Secondary	Current smoker	Sedentary	10	No DR	0	0	120	34.68	124	70	7.3	172	33	99	119.2	0	0		2	0	0		1	0	30
91	T2DM	0	59	1	Primary	Current smoker	Sedentary	23	No DR	0	0	79	21.99	140	70	6	200	75	166	91.8	0	0		0	0	0		0	0	29
92	T2DM	0	72	1	< Primary	Non smoker	Regular physical activity	15	No DR	1	1	96	32.08	159	76	6.7	165	65	117	76.6	1	0		3	0	-0.333333		2	4	28
95	T2DM	0	67	0	Primary	Current smoker	Regular physical activity	10	No DR	1	0	109	34.75	148	80	7.3	165	49	81	99.8	0	0		1	-1	-0.333333		4	0	23
96	T2DM	0	59	1	Primary	Non smoker	Regular physical activity	30	DR	0	0	111	40.36	156	81	8.4	165	54	62	98.6	1	0		-1	-2	-2.11111		5	3	13
97	T2DM	0	61	0	Primary	Current smoker	Sedentary	7	DR	0	0	93	24.78	124	57	8.5	182	38	156	112.8	0	1		2	0	0		4	0	18
98	T2DM	0	49	0	Primary	Former smoker	Regular physical activity	4	DR	1	0	104	30.52	168	80	9.6	106	37	81	52.8	0	0		0	0	-0.473684		0	0	29
99	T2DM	0	61	0	< Primary	Current smoker	Regular physical activity	7	DR	0	0	114	33.46	133	71	6.9	175	42	182	96.6	0	0		0	-2	-1.63158		5	0	20
100	T2DM	0	61	1	Secondary	Non smoker	Regular physical activity	5	No DR	0	0	100	36.74	135	101	5.5	152	41	110	89	0	0		2	0	-0.0526316		5	0	31
103	T2DM	0	58	1	Primary	Former smoker	Sedentary	2	No DR	0	0	124	40.05	142	83	8	244	56	190	150	0	0		1	0	-0.111111		0	2	32
104	T2DM	0	68	0	Primary	Current smoker	Regular physical activity	3	DR	0	0	82.5	20.58	153	99	7.6	124	51	106	51.8	0	1		1	0	0		3	0	20
105	T2DM	0	62	1	Primary	Non smoker	Regular physical activity	3	No DR	1	1	96	29.05	134	82	6.6	193	62	90	113	0	0		1	-1	-0.555556		6	6	23
106	T2DM	0	47	0	Primary	Non smoker	Sedentary	6	DR	0	0	90	24.51	111	65	9.7	150	47	45	94	1	0		1	-1	-0.526316		6	0	18
107	T2DM	0	42	1	< Primary	Current smoker	Regular physical activity	16	DR	1	1	142	54.82	157	86	12.5	219	26	342	133	1	1		0	-1	-1.25		6	3	28
109	T2DM	0	72	0	Primary	Non smoker	Regular physical activity	6	No DR	0	0	106	29.98	169	72	8.1	182	43	123	114.4	0	0		0	-1	-0.666667		5	0	28
111	T2DM	0	69	0	Primary	Former smoker	Regular physical activity	10	DR	1	0	114.5	29.75	135	72	8.2	220	52	57	156.6	0	0		1	-2	-0.833333		4	2	20
112	T2DM	0	66	0	Secondary	Current smoker	Sedentary	4	DR	1	0	114	35.01	150	82	7.7	249	82	110	145	0	0		1	0	0		5	0	22
113	T2DM	0	66	0	Primary	Non smoker	Sedentary	7	No DR	0	0	107	27.85	150	100	8	215	46	83	152.4	0	0		1	0	-0.947368		0	2	21
116	T2DM	0	54	0	Secondary	Former smoker	Sedentary	12	DR	0	0		26.7	150	83	6.3	186	36	108	108.4	0	0		0	0	-1.83333		0	0	21
117	T2DM	0	59	0	Secondary	Non smoker	Regular physical activity	19	DR	1	0	110	33.68	142	63	8	204	39	175	130	0	1		1	-2	-0.944444		0	1	26
118	T2DM	0	59	1	Primary	Non smoker	Regular physical activity	8	DR	1	1	150	46.11	165	90	9.1	217	57	140	132	1	1		1	-2	-1.11765		3	2	18
120	T2DM	0	55	0	Primary	Former smoker	Regular physical activity	13	DR	0	1	112	34.24	127	70	10	153	58	89	77.2	0	0		2	-2	-1.73684		6	1	19
121	T2DM	0	55	0	Primary	Current smoker	Regular physical activity	1	No DR	0	0	98	26.08	125	72	5.9	194	48	91	127.8	0	0		1	-1	0		0	0	17
123	T2DM	0	55	0	Secondary	Current smoker	Regular physical activity	8	DR	1	1	113	33.31	162	97	7.6	143	33	135	83	0	1		1	-1	-0.777778		2	2	29
125	T2DM	0	58	1	Primary	Non smoker	Sedentary	21	DR	1	0	119	35.13	137	55	8.9	172	45	213	84.4	1	1		-1	-3	-3		4	0	19
126	T2DM	0	67	1	Primary	Non smoker	Sedentary	26	DR	1	0	113	38.48	101	68	8.1	190	42	196	108.8	1	0		1	-2	-0.722222		6	0	9
127	T2DM	0	56	1	Primary	Current smoker	Regular physical activity	1	No DR	0	1	88	27.39	147	72	7.2	233	42	110	169	0	0		1	-1	-1.05882		4	2	19
128	T2DM	0	58	1	Graduate or higher	Non smoker	Sedentary	10	No DR	0	0		33.76	127	77	7.5	218	62	74	141.2	0	0		-1	0	-0.0555556		6	5	19
129	T2DM	0	70	1	Primary	Non smoker	Sedentary		DR	0	1	108	29.01	180	82	7.2	202	62	70	126	1	1		1	0	-0.388889		0	0	26
130	T2DM	0	70	0	Primary	Non smoker	Regular physical activity	8	No DR	1	1	111	29.76	130	79	8.5	151	36	175	80	0	0		1	-2	-0.777778		2	2	21
131	T2DM	0	52	1	Secondary	Current smoker	Sedentary	16	DR	1	0	114	39.4	153	67	9.4	197	46	61	138.8	1	1		0	-2	-5.70588		0	0	25
132	T2DM	0	61	1	Primary	Non smoker	Regular physical activity	5	DR	1	1	95	26.92	170	88	8.5	181	48	144	104.2	1	1		1	0	-0.5		6	5	25
133	T2DM	0	68	1	< Primary	Non smoker	Regular physical activity	10	DR	1	0	83	20.71	156	87	8.2	203	88	111	92.8	0	1		0	0	0.166667		5	4	25
134	T2DM	0	67	1	Primary	Non smoker	Regular physical activity	10	DR	0	0	103.5	26.7	179	94	10.9	218	45	134	146.2	1	0		-1	-2	-1.38889		6	0	23
136	T2DM	0	73	1	Primary	Non smoker	Sedentary	10	DR	1	1	86	28.15	130	69	6.8	231	55	84	159.2	0	0		0	-1	-0.764706		3	0	28
137	T2DM	0	54	1	Primary	Non smoker	Sedentary	7	DR	1	1	115.5	36.13	147	86	8.9	248	60	120	164	1	0		1	0	-0.588235		5	0	33
138	T2DM	0	52	0	Primary	Former smoker	Regular physical activity	4	DR	1	1	120	35.51	120	85	10.5	135	27	317	60	0	0		1	0	-0.111111		0	0	30
139	T2DM	0	65	1	Primary	Non smoker	Sedentary	37	DR	0	1	116	35.54	124	62	8.9	214	61	146	123.8	1	0		-3	-2	-2.88889		5	2	12
140	T2DM	0	55	1	< Primary	Non smoker	Sedentary	15	No DR	1	0	126	47.11	88	52	6.9	178	37	157	109.6	0	0		0	-1	-1		2	0	25
141	T2DM	0	54	1	Secondary	Current smoker	Regular physical activity	3	No DR	0	0	122	38.48	160	82	7.9	160	38	142	93.6	0	0		0	0	-0.777778		0	1	26
142	T2DM	0	51	1	Primary	Non smoker	Sedentary	3	No DR	1	1	101	31.39	109	72	8.4	142	54	101	67.8	0	0		0	-1	0		6	0	17
143	T2DM	0	71	0	< Primary	Former smoker	Regular physical activity	26	DR	1	0		22.11	148	60	10.3	129	38	103	70.4	1	0		1	0	-0.0526316		6	6	14
144	T2DM	0	65	1	< Primary	Non smoker	Sedentary	7	DR	1	0	120	42	139	100	6.6	154	68	67	72.6	0	0		-3	-3	-2.75		5	6	12
145	T2DM	0	55	1	Secondary	Former smoker	Regular physical activity	13	DR	1	0	94	27.08	122	72	8.3	234	49	107	163.6	1	0		1	-1	-0.352941		2	0	15
146	T2DM	0	49	1	< Primary	Non smoker	Sedentary	20	DR	1	1	109	33.71	163	80	11.1	188	60	137	100.6	1	0		0	-2	-2.23529		5	5	18
147	T2DM	0	71	1	Primary	Non smoker	Regular physical activity	25	DR	1	0	114	33.28	153	60	9.6	194	60	144	105.2	1	1		-1	-2	-3.23529		6	2	20
149	T2DM	0	53	0	Primary		Sedentary	2	No DR	0	1	107	30.55	145	79	6.1	172	45	172	92.6	0	0		1	0	0		2	0	28
150	T2DM	0	55	0	Primary	Non smoker	Sedentary	15	DR	1	1	91	28.08	134	69	7.8	187	46	168	107.4	1	0		1	-1	-0.947368		6	2	18
151	T2DM	0	48	1	< Primary	Non smoker	Regular physical activity	10	DR	0	0	105	29.57	122	80	10.7	170	52	168	84.4	0	0		1	-2	-0.125		3	0	23
152	T2DM	0	51	1	Primary	Non smoker	Regular physical activity	22	No DR	1	0	106	28.6	147	74	7.4	169	43	142	97.6	0	0		1	0	-1.16667		4	2	32
154	T2DM	0	54	1	Primary	Former smoker	Regular physical activity	16	DR	1	1		50.32	122	55	6.9	176	47	175	94	0	0		1	-2	-0.125		3	0	23
155	T2DM	0	73	1	Primary	Non smoker	Regular physical activity	13	No DR	1	0	74	33.32	170	74	6.6	201	69	65	119	0	0		2	0	-0.866667		0	0	25
156	T2DM	0	71	0	Primary	Current smoker	Regular physical activity	26	DR	1	1	108	28.93	166	73	9.1	172	37	158	103.4	1	1		1	0	-0.222222		6	6	31
157	T2DM	0	53	1	Primary	Non smoker	Regular physical activity	12	DR	1	0	104	32.86	154	91	7.7	182	52	94	111.2	1	0		1	-1	-0.944444		6	0	25
158	T2DM	0	53	1	Secondary	Current smoker	Regular physical activity	15	DR	0	0	102	30.24	141	78	8.4	240	57	115	160	1	0		2	-2	-0.473684		4	1	21
160	T2DM	0	47	1	Primary	Non smoker	Regular physical activity	10	No DR	0	1	84	24.76	143	84	7.1	217	66	100	131	0	0		2	-2	-1.26316		0	3	30
161	T2DM	0	47	1	Primary	Former smoker	Regular physical activity	4	No DR	0	1	112	39.43	104	63	8.3	129	36	190	55	1	0		0	0	-0.947368		3	5	15
162	T2DM	0	40	0	Graduate or higher	Former smoker	Sedentary	1	No DR	1	0	126	37.75	130	82	7	191	47	133	117.4	0	0		2	0	0		1	0	18
163	T2DM	0	68	1	Primary	Non smoker	Regular physical activity	7	No DR	0	1	105	31.11	138	76	7	106	52	118	130.4	0	0		1	0	-0.277778		0	0	30
164	T2DM	0	46	0	Primary	Current smoker	Regular physical activity	1	No DR	0	0	101	30.3	149	71	5.7	159	51	82	91.6	0	0		1	0	-0.117647		0	0	26
165	T2DM	0	41	0	Secondary	Non smoker	Regular physical activity	2	No DR	0	0	107	29.46	135	79	8.4	219	41	176	142.8	0	0		0	-2	-2.84211		6	3	19
166	T2DM	0	41	0	Secondary	Non smoker	Sedentary	2	No DR	0	0	116	36.31	137	75	6.4	212	41	125	146	0	0		1	0	-1.63158		0	0	14
167	T2DM	0	40	1	Primary	Non smoker	Regular physical activity	1	No DR	0	0		33.96	113	68	6.7	262	50	216	168.8	0	0		1	0	-0.368421		5	6	30
168	T2DM	0	40	1	Primary	Non smoker	Sedentary	7	No DR	0	0	96	29.04	152	87	5.3	232	59	178	137.4	0	0		1	0	-0.473684		0	0	23
169	T2DM	0	45	1	Primary	Current smoker	Sedentary	1	No DR	1	0	123	37.5	137	88	6.7	207	50	100	137	0	0		1	-2	-0.578947		3	0	28
170	T2DM	0	70	1	Primary	Non smoker	Sedentary	9	DR	0	1		34.95	143	73		192	60	119	108.2	0	0		0	0	-0.8		2	5	24
171	T2DM	0	73	0	Secondary	Current smoker	Regular physical activity	15	DR	1	1	122	32.63	151	68	6.1	200	40	137	132.6	0	0		1	-1	-1.10526		0	0	31
172	T2DM	0	43	1	Primary	Non smoker	Regular physical activity	4	No DR	1	0	133	49.1	144	72	7.1	178	50	123	103.4	0	0		2	-2	-1.61111		4	3	27
173	T2DM	0	72	0	Primary	Former smoker	Sedentary	8	DR	1	1	107	31.64	182	80	7.4	154	56	67	84.6	1	0		0	-2	-3		6	4	20
176	T2DM	0	47	1	Secondary	Former smoker	Sedentary	10	DR	1	1	122	37.29	142	82	7.5	124	44	90	62	0	1		0	-1	-1.89474		6	0	25
177	T2DM	0	45	0	Primary	Current smoker	Regular physical activity	8	DR	1	1	104	29.03	140	71	8.5	134	66	62	55.6	0	0		2	-2	-1.26316		0	3	26
178	T2DM	0	52	0	Primary	Former smoker	Sedentary	7	No DR	0	1	138	43.1	147	87	11.5	139	37	165	69	0	0		1	0	0		6	0	25
179	T2DM	0	62	1	Primary	Non smoker	Sedentary	37	DR	0	0	109	32.39	139	82	10	186	60	339	90	1	0		-2	0	-2.6875		6	6	10
180	T2DM	0	56	1	< Primary	Non smoker	Sedentary	20	DR	0	0	110	32.96	132	71	7.2	160	64	72	81.6	1	0		0	-1	-0.888889		0	1	31
181	T2DM	0	65	0	Primary	Current smoker	Sedentary	20	DR	0	0	100	23.84	120	72	7.8	174	61	72	98.6	0	0		0	0	0		3	1	30
182	T2DM	0	70	0	Primary	Non smoker	Sedentary	6	DR	1	0	103	28.52	165	73	7.2	172	45	98	107.4	0	1		1	0	-0.421053		4	0	30
183	T2DM	0	54	0	Secondary		Sedentary	3	No DR	1	0	114	33.28	153	60	6.9	196	60	77	120.6	0	0		3	0	-0.473684		4	0	34
184	T2DM	0	73	0	Secondary	Former smoker	Regular physical activity	1	No DR	1	0	96	24.86	145	64	6	220	35	224	140.2	0	0		3	-1	0		2	0	20
185	T2DM	0	58	0	Secondary	Former smoker	Regular physical activity	10	DR	1	0		29.74	132	68	7.1	173	30	192	104.6	0	0		1	-2	-0.684211		5	0	16
186	T2DM	0	60	1	Secondary	Non smoker	Sedentary	29	DR	0	0		38.39	135	82	7.8	204	40	147	134.6	1	0		-2	-1	-2.21053		2	3	30
188	T2DM	0	47	1	Secondary	Current smoker	Sedentary	1	No DR	0	0	96	27.78	127	79	6.6	218	39	223	134.4	0	0		1	0	0		4	0	25
190	T2DM	0	71	0	Primary	Former smoker	Regular physical activity	1	No DR	0	0	106	26.99	121	67	6.1	197	62	61	122.8	0	0		1	0	-0.166667		0	0	29
191	T2DM	0	44	1	Primary	Former smoker	Sedentary	2	No DR	0	1	98	33.98	118	67	7.5	166	54	66	98.8	0	1		0	0	0		6	2	18
193	T2DM	0	52	1	Secondary	Current smoker	Sedentary	5	No DR	0	0	111	36.03	132	84	8	267	69	157	166.6	0	0		-1	0	-0.611111		6	0	25
194	T2DM	0	50	0	Secondary	Current smoker	Regular physical activity	5	No DR	1	1	113	33.82	139	86	7.1	174	58	102	95.6	0	0		1	0	-0.0526316		2	0	25
195	T2DM	0	57	1	Secondary	Non smoker	Regular physical activity	6	No DR	0	0	130	44.2	130	74	6.9	178	44	243	85.4	0	0		1	-2	-0.466667		6	6	33
196	T2DM	0	42	0	Primary	Former smoker	Sedentary	3	No DR	0	1	117	36.16	134	80	9.8	182	26	188	118.4	1	0		3	0	-0.736842		6	0	25
197	T2DM	0	52	1	Primary	Non smoker	Sedentary	5	No DR	1	0	123	39.66	126	87	8.1	169	42	109	105.2	0	0		1	-2	-0.0588235		6	3	32
198	T2DM	0	63	1	Primary	Non smoker	Sedentary	22	No DR	0	1	91	23.91	124	77	7.7	183	67	80	100	0	0		1	-1	-0.263158		6	0	30
199	T2DM	0	62	1	Primary	Non smoker	Regular physical activity	1	No DR	1	0	103	28.76	149	94	6.5	186	56	120	106	0	0		2	0	-0.3125		0	0	27
200	T2DM	0	56	1	Primary	Non smoker	Regular physical activity	15	DR	1	0	117	41.83	144	77	8.6	254	35	331	174	1	1		0	-2	-0.235294		6	0	29
201	T2DM	0	68	1	< Primary	Non smoker	Sedentary	15	No DR	1	1	104	32.38	130	63	7.6	178	40	148	108.4	0	0		0	-1	-0.411765		2	2	30
202	T2DM	0	44	1	Secondary	Current smoker	Regular physical activity	11	No DR	0	0	95	32.82	119	77	7.5	205	51	85	137	0	0		0	-1	-1.26316		2	5	36
203	T2DM	0	58	1	Primary	Non smoker	Regular physical activity	20	DR	1	1	102	36.21	143	68	10.5	170	61	86	91.8	1	1		0	0	-0.833333		0	4	22
205	T2DM	0	48	0	Primary	Former smoker	Sedentary	2	DR	1	0	129	42.63	140	80	9	213	33	202	139.6	0	0		0	-1	-0.842105		6	0	31
206	T2DM	0	43	0	Secondary	Non smoker	Regular physical activity	1	No DR	1	1		34.95	159	92	6	225	28	699	82	0	0		1	0	-0.5		5	0	29
207	T2DM	0	44	0	Primary	Current smoker	Regular physical activity	2	No DR	1	0	118	37.02	150	82	6.1	155	42	173	78.4	0	0		1	-1	-0.789474		0	1	32
208	T2DM	0	71	1	Primary	Non smoker	Regular physical activity	30	DR	1	1	109	35.02	160	68	7.8	163	72	107	69.6	1	0		0	-2	-1.2		6	5	24
209	T2DM	0	50	0	Primary	Former smoker	Sedentary	17	DR	0	1	116	29.74	160	74	7.1	157	27	333	87	1	0		-3	0	-0.444444		6	0	34
210	T2DM	0	58	0	Secondary	Former smoker	Regular physical activity	22	DR	1	1	111	33.51	153	83	10.1	164	21	295	100	1	0		-3	-3	-3.58824		6	6	13
213	T2DM	0	66	1	Primary	Non smoker	Regular physical activity	15	DR	0	1	106	30	179	93	8.6	191	73	81	101.8	1	0		0	-2	-4.66667		6	6	10
214	T2DM	0	57	0	Secondary	Current smoker	Regular physical activity	20	DR	1	0	123	34.69	165	92	8.5	214	88	76	110.8	1	0		1	-2	-3		5	6	28
215	T2DM	0	41	0	Primary	Current smoker	Sedentary	4	DR	0	1	108	29	123	85	7.2	214	39	161	142.8	0	0		1	-1	-0.166667		1	0	25
216	T2DM	0	60	1	Primary	Non smoker	Regular physical activity	20	DR	1	1	106	30.33	136	79	6.3	202	98	79	88.2	1	0		1	0	-0.5		5	0	29
217	T2DM	0	48	0	Primary	Former smoker	Regular physical activity	10	DR	0	0	100	26.64	182	94	9.2	267	115	82	135.6	1	0		1	0	-0.157895		5	5	25
219	T2DM	0	62	0	< Primary	Former smoker	Regular physical activity	20	No DR	0	1	110	33.02	129	72	6.9	154	52	89	84.2	0	0		0	-1	-1.11111		6	0	27
223	T2DM	0	45	0	Secondary	Current smoker	Regular physical activity	3	DR	1	1	120	36.73	141	80	7.9	174	38	202	95.6	0	0		2	0	-0.631579		3	0	29
224	T2DM	0	64	1	Primary	Non smoker	Regular physical activity	8	DR	0	0	104	33.12	125	70	7.1	168	73	68	81.4	0	0		0	0	-0.611111		2	4	28
225	T2DM	0	48	0	Secondary	Non smoker	Sedentary	2	DR	0	1	103	29.31	125	72	8	265	53	179	176.2	1	0		3	0	-0.0526316		5	0	28
226	T2DM	0	47	0	Primary	Current smoker	Sedentary	4	No DR	0	1	102	32.6	123	70	8.9	235	47	371	120	0	0		3	0	-0.842105		3	0	36
227	T2DM	0	40	0	Primary	Current smoker	Sedentary	8	No DR	0	0	125	37.51	130	63	6.3	132	32	130	74	0	0		-1	0	-1.42105		4	1	27
228	T2DM	0	58	0	Primary	Current smoker	Regular physical activity	5	DR	0	0	99	27.54	167	81	11.2	273	48	168	191.4	0	1		0	-1	-0.705882		4	0	30
231	T2DM	0	51	0	Primary	Current smoker	Regular physical activity	8	DR	1	0	103	27.97	128	73	8.2	175	33	276	108	0	1		-2	-2	-1.57895		6	5	28
234	T2DM	0	58	0	Primary	Former smoker	Sedentary	7	No DR	1	1	100	28.44	125	77	8.4	124	45	83	62.4	0	0		1	0	-0.578947		5	5	27
235	T2DM	0	46	1	Secondary	Non smoker	Sedentary	4	No DR	0	0	103	36.49	143	69	5.5	189	43	157	114.6	0	0		1	-1	-0.368421		2	0	25
236	T2DM	0	59	0	Secondary	Former smoker	Regular physical activity	7	No DR	0	1		26.78	139	72	7.2	170	45	237	77.6	0	0		2	-1	-0.611111		0	0	31
237	T2DM	0	62	0	Primary	Former smoker	Regular physical activity	6	No DR	1	0	101	28.49	183	93		135	37	57	86.6	0	0		2	-2	0		4	0	34
238	T2DM	0	75	0	< Primary	Former smoker	Regular physical activity	5	No DR	1	1	109	28.52	134	62	6.7	154	40	128	88.4	0	0		1	0	-0.888889		5	0	28
241	T2DM	0	49	1	Primary	Former smoker	Sedentary	1	DR	0	0	113	36.09	170	103	6.7	247	67	63	167.4	0	1		0	0	0		5	0	5
243	T2DM	0	75	1	< Primary	Non smoker	Sedentary	23	DR	1	0	108	32.06	131	87	10.4	181	43	136	110.8	1	1		0	-1	-1.2		6	0	16
244	T2DM	0	70	1	Primary	Non smoker	Regular physical activity	11	DR	1	0	123	39.69	169	64	7.8	176	42	133	107.4	1	0		-1	-2	-1.78571		1	0	27
245	T2DM	0	44	0	Primary	Current smoker	Regular physical activity	6	DR	1	1	106	31.47	137	90	8.6	171	37	136	106.8	1	1		0	-2	-0.789474		5	0	26
246	T2DM	0	71	0	Primary	Former smoker	Regular physical activity	17	DR	1	1	117	32.63	160	76	7.2	164	42	139	94.2	1	0		2	-2	-1.76471		6	0	25
248	T2DM	0	56	0	Primary	Current smoker	Regular physical activity	4	DR	1	0	106	30.53	117	68	5.6	172	17	332	96	0	0		-2	1	-2.55556		6	6	26
249	T2DM	0	67	1	< Primary	Non smoker	Regular physical activity	11	DR	1	1	108	37.14	140	65	9.1	175	61	155	83	1	0		1	-2	-0.882353		4	5	26
250	T2DM	0	64	1	Primary	Non smoker	Regular physical activity	8	DR	1	0	108	32.26	146	66	6.9	172	34	157	106.6	1	0		0	-2	-2.375		5	0	15
252	T2DM	0	69	0	Secondary	Former smoker	Regular physical activity	32	DR	0	0	95	25.42	143	90	6.6	191	63	57	116.6	1	0		3	-1	-0.944444		2	1	28
253	T2DM	0	64	1	Primary	Non smoker	Regular physical activity	3	DR	0	0	107	36.89	147	92	5.7	218	52	172	131.6	0	0		0	0	0		0	6	31
254	T2DM	0	70	1	Primary	Non smoker	Regular physical activity	10	DR	1	1	112	33.12	176	88	8.6	162	34	167	94.6	0	0		1	-1	-1.25		5	0	33
255	T2DM	0	55	0	Secondary	Current smoker	Regular physical activity	24	DR	0	0	80	21.24	138	77	8.3	255	77	250	128	1	0		1	0	-0.368421		1	2	31
256	T2DM	0	60	0	Primary	Current smoker	Regular physical activity	20	DR	0	0	90	21.15	95	74	8.3	151	63	53	77.4	1	0		2	-2	-1.05556		0	0	27
258	T2DM	0	75	0	Primary	Former smoker	Regular physical activity	15	DR	1	1	104	28.5	160	94	7.7	164	45	72	104.6	0	0		1	-1	-0.529412		0	0	32
259	T2DM	0	67	1	Secondary	Current smoker	Sedentary	17	DR	0	1	104	28.96	146	87	9.4	225	60	232	118.6	1	0		3	0	-0.222222		6	0	31
260	T2DM	0	71	1	Primary	Non smoker	Regular physical activity	34	DR	1	1	99	30.04	140	78	7.7	152	43	107	87.6	1	0		1	-2	-0.625		3	1	29
261	T2DM	0	64	1	Primary	Non smoker	Sedentary	13	No DR	1	1	104	31.64	119	68	6.8	184	58	183	89.4	0	0		2	0	-0.166667		0	0	29
262	T2DM	0	48	0	Secondary	Non smoker	Sedentary	12	No DR	1	1	119	35.32	143	84	6.6	165	34	233	84.4	0	0		0	-1	-1.63158		2	0	32
263	T2DM	0	40	1	Secondary	Non smoker	Regular physical activity	2	No DR	0	0	121	40.22	160	90	6.1	157	48	103	88.4	0	0		1	1	-0.133333		0	2	25
264	T2DM	0	52	0	Secondary	Former smoker	Regular physical activity	16	No DR	0	1	94	25.89	139	78	6.6	194	49	96	125.8	0	0		1	0	-0.888889		2	1	29
266	T2DM	0	61	1	Primary	Non smoker	Regular physical activity	10	No DR	1	0	117	36.32	113	73	7.2	163	43	209	78.2	0	0		1	0	-0.0588235		0	0	26
267	T2DM	0	60	1	Primary	Non smoker	Regular physical activity	4	No DR	1	1	98	29.28	136	68	5.9	160	53	99	87.2	0	0		1	-1	-0.0555556		0	4	31
268	T2DM	0	72	1	Primary	Non smoker	Sedentary	8	No DR	1	1	101	31.83	134	86	6.8	229	60	262	133	0	0		3	0	-0.125		4	0	23
270	T2DM	0	73	0	< Primary	Former smoker	Sedentary	20	DR	1	1	116	33.27	135	78	8.1	137	46	224	46.2	0	0		1	-2	-2.11111		6	3	23
271	T2DM	0	73	0	Secondary	Former smoker	Regular physical activity	9	No DR	1	1	111	30.86	117	67	5.7	147	40	127	81.6	0	0		1	0	-0.388889		0	0	21
272	T2DM	0	72	0	Primary	Former smoker	Sedentary	11	No DR	1	1	103	30.86	139	72	7.4	174	63	75	96	0	0		0	0	-0.1875		0	0	34
273	T2DM	0	54	0	Primary	Former smoker	Regular physical activity	10	No DR	1	0	103	28.63	125	76	8.6	188	66	65	109	0	0		2	-2	-0.631579		0	1	28
275	T2DM	0	69	0	Secondary	Former smoker	Sedentary	8	No DR	1	1	106	29.31	135	70		163	47	125	91	0	0		1	-1	-0.526316		0	0	28
276	T2DM	0	68	0	Secondary	Former smoker	Regular physical activity	12	No DR	1	0	88	25.6	123	65	7.1	188	62	65	113	0	0		3	0	-0.222222		2	0	36
278	T2DM	0	68	0	< Primary	Non smoker	Regular physical activity	2	No DR	1	0	96	26.7	146	110	6.2	160	54	113	83.4	0	0		3	0	-0.333333		0	0	30
279	T2DM	0	69	0	Primary	Current smoker	Regular physical activity	5	No DR	1	0	111	33.31	143	86	7.1	177	42	146	105.8	0	0		1	-1	-0.647059		4	2	24
280	T2DM	0	48	0	Primary	Former smoker	Regular physical activity	5	No DR	0	0	108	29.63	134	84	6.5	199	63	85	119	0	0		1	0	-0.789474		4	0	23
281	T2DM	0	70	1	Primary	Non smoker	Sedentary	8	No DR	1	0	106	33.92	142	77	5.8	240	58	223	137.4	0	0		-2	-1	-0.352941		1	0	34
282	T2DM	0	61	0	Primary	Current smoker	Regular physical activity	4	No DR	0	0	105	28.1	121	54	8.1	137	43	68	80.4	0	0		1	0	-0.529412		1	2	30
284	T2DM	0	45	0	Primary	Non smoker	Regular physical activity	14	DR	1	0	110	30.58	143	74	7.9	144	44	60	88	1	0		-1	-2	-3.1875		2	0	30
285	T2DM	0	40	1	Primary	Non smoker	Sedentary	1	No DR	0	0	111	32.98	119	65	6.5	166	51	185	78	0	0		2	0	-1.78947		1	0	27
287	T2DM	0	68	1	Graduate or higher	Non smoker	Sedentary	1	No DR	1	0	115	32.29	111	75	6.3	205	46	189	121.2	0	0		3	0	-0.0625		0	0	36
288	T2DM	0	52	1	Primary	Current smoker	Regular physical activity	10	No DR	1	1		37.44	133	75	6	198	43	140	127	0	0		0	0	-0.31579		0	2	36
289	T2DM	0	52	0	Primary	Current smoker	Regular physical activity	3	DR	1	1	104	27.77	156	83	6.7	200	35	187	127.6	0	0		1	-2	-0.666667		0	0	32
290	T2DM	0	70	1	Secondary	Non smoker	Regular physical activity	8	DR	0	1	96	31.14	135	78	7.3	254	55	163	166.4	0	0		1	0	-0.0625		2	3	34
291	T2DM	0	66	0	Primary	Current smoker	Regular physical activity	4	No DR	1	1	97	26.67	123	63	6	148	48	73	85.4	0	0		1	0	-0.166667		0	0	33
292	T2DM	0	51	1	Secondary	Current smoker	Sedentary	2	No DR	0	0	119	33.16	127	72	7.8	288	47	143	212.4	1	0		2	0	-0.894737		4	0	28
294	T2DM	0	51	0	Primary	Non smoker	Sedentary	4	No DR	0	0	96	26.27	138	90	6.6	233	45	139	160.2	0	0		1	0	-0.210526		2	0	28
295	T2DM	0	64	0	Graduate or higher	Current smoker	Regular physical activity	2	No DR	0	1	102	25.89	142	74	7	204	31	109	151.2	0	0		2	-1	-0.0526316		0	0	33
296	T2DM	0	71	0	Secondary	Former smoker	Regular physical activity	7	No DR	1	1	106	27.7	142	81	7.8	250	45	263	150	0	0		-2	-1	-0.222222		2	0	25
297	T2DM	0	56	0	Secondary	Former smoker	Sedentary	14	DR	1	1	102	42.03	159	86	8	139	45	129	68.2	1	1		-1	-2	-2.68421		3	1	32
298	T2DM	0	66	0	Primary	Former smoker	Regular physical activity	7	DR	1	0	101	25.28	149	70	8	162	53	38	101.4	0			1	-1	-0.235294		4	0	31
299	T2DM	0	72	0	Primary	Non smoker	Sedentary	3	No DR	1	0	103	29.16	119	48	6.4	153	40	81	96.8	0	0		1	-1	-0.0588235		4	0	19
300	T2DM	0	47	0	< Primary	Current smoker	Sedentary	12	DR	1	1	100	29.38	135	86	13.4	294	22	1324	90	0	1		1	-2	-0.944444		6	0	33
301	T2DM	0	54	1	Primary	Non smoker	Regular physical activity	8	No DR	1	0	104	39.52	113	81	5.6	235	75	66	146.8	0	0		2	0	-0.333333		0	3	36
302	T2DM	0	48	0	Graduate or higher	Former smoker	Regular physical activity	8	No DR	0	0	102	31.34	109	76	6.8	245	41	102	183.6	0	0		2	0	-0.0526316		1	3	30
303	T2DM	0	40	0	Graduate or higher	Current smoker	Regular physical activity	2	No DR	1	0	102	27.83	133	79	5.5	200	39	165	128	1	0		1	-1	-0.333333		0	3	32
304	T2DM	0	73	1	< Primary	Non smoker	Regular physical activity	9	No DR	1	1	104	32.87	170	105	9.2	238	55	134	156.2	1	0		2	-1	-2.52941		6	4	33
306	T2DM	0	56	1	Primary	Non smoker	Regular physical activity	1	DR	1	1	88	26.56	121	75	6.2	197	57	95	121	0	0		0	0	-0.0555556		0	0	35
307	T2DM	0	64	1	Primary	Non smoker	Sedentary	7	DR	1	0	104	30.69	126	66	7.1	234	72	87	144.6	0	0		0	0	-0.0555556		2	0	36
308	T2DM	0	71	0	Graduate or higher	Former smoker	Regular physical activity	15	DR	0	0	110	29.55	143	80	6.9	202	60	68	128.4	1	0		2	-2	-1.44444		5	0	34
309	T2DM	0	63	0	Secondary	Former smoker	Regular physical activity	7	No DR	1	0	103	25.93	146	94	8.3	195	32	188	125.4	0	0		2	0	-0.157895		4	1	33
310	T2DM	0	66	1	Primary	Non smoker	Sedentary	3	DR	1	0	122	42.8	177	89	9.8	220	59	165	128	0	0		1	-1	-0.470588		6	0	31
312	T2DM	0	72	1	Primary	Non smoker	Regular physical activity	8	No DR	1	0	108	29.12	148	74	6.6	154	51	56	91.8	0	0		0	0	-0.166667		1	0	29
313	T2DM	0	72	0	Primary	Former smoker	Regular physical activity	20	DR	1	1	109	28.91	145	67	10.7	176	62	93	95.4	0	0		2	-1	-0.625		6	0	29
315	T2DM	0	63	1	< Primary	Non smoker	Regular physical activity	1	No DR	1	0	100	27.68	154	88	6.9	235	52	111	160.8	0	0		1	0	0		0	0	30
316	T2DM	0	72	0	Primary	Former smoker	Sedentary	15	No DR	1	0	96	27.12	120	71	6.4	193	35	139	130.2	0	0		1	0	-0.368421		0	0	32
317	T2DM	0	69	1	Primary	Non smoker	Sedentary	28	DR	1	0	112	29.65	111	66	8.4	195	68	117	103.6	1	1		1	-1	-1.22222		5	5	26
319	T2DM	0	41	1	Primary	Current smoker	Regular physical activity	12	No DR	1	0	112	36.73	155	74	6.5	142	38	202	63.6	0	0		0	-2	-2.73684		6	6	33
323	T2DM	0	52	1	Primary	Former smoker	Sedentary	10	No DR	0	0	80	19.4	95	65	7.6	211	60	102	130.6	1	0		1	-2	-3.76471		5	2	8
326	T2DM	0	65	0	Primary	Former smoker	Regular physical activity	3	DR	0	0	107	28.31	166	79	7	173	58	78	99.4	0	0		1	0	-1		2	0	23
328	T2DM	0	69	0	Primary	Former smoker	Regular physical activity	11	DR	0	1	101	28.16	128	60	7.8	155	40	169	81.2	0	0		1	0	-0.0588235		0	0	34
329	T2DM	0	55	1	Primary	Non smoker	Regular physical activity	30	DR	0	1	85	25.64	113	71	9.6	206	87	78	103.4	1	1		0	-2	-3.11765		6	2	16
330	T2DM	0	53	1	Secondary	Non smoker	Regular physical activity	22	No DR	1	1	102	25.47	108	63	8.2	176	48	154	97.2	0	0		1	0	-0.111111		6	2	20
331	T2DM	0	48	0	Primary	Former smoker	Regular physical activity	6	No DR	0	0	93	27.04	116	74	5.9	254	58	158	164.4	0	0		1	0	0		0	0	30
334	T2DM	0	52	0	Primary	Non smoker	Regular physical activity	12	No DR	1	0	110	34.66	133	76	7.2	186	43	99	123.2	1	0		1	-2	-0.631579		4	1	29
335	T2DM	0	64	1	< Primary	Non smoker	Sedentary	37	DR	1	0	134	41.11	133	53	9.1	154	54	171	65.8	1	0		-3	-3	-3.41176		5	6	16
338	T2DM	0	58	1	Primary	Non smoker	Regular physical activity	30	DR	1	0	95	25.85	123	44	8.3	193	59	68	120.4	1	0		0	-2	-3.22222		4	4	30
339	T2DM	0	56	0	Secondary	Non smoker	Regular physical activity	6	DR	1	0	95	23.56	89	61	8.3	204	45	83	142.4	0	0		0	-2	-2.47059		1	0	29
341	T2DM	0	72	0	Secondary	Former smoker	Regular physical activity	22	DR	1	0	112	30.78	156	68	6.5	172	43	88	111.4	1	0		1	-1	-2.31579		0	0	4
342	T2DM	0	71	1	Primary	Non smoker	Regular physical activity	13	DR	1	1	125	36.79	146	77	8.9	179	48	113	108.4	1	0		0	-3	-1.8125		6	6	20
344	T2DM	0	48	0	Secondary	Current smoker	Regular physical activity	2	DR	0	0	112.5	36.32	110	74	8.1	192	45	220	103	1	0		-1	-2	0		5	1	36
345	T2DM	0	60	1	Secondary	Current smoker	Sedentary	3	No DR	1	1	113	33.76	107	54	6.6	162	38	144	95.2	1	0		1	0	-0.722222		2	0	26
346	T2DM	0	55	0	Primary	Former smoker	Regular physical activity	20	DR	1	0	120	35.89	139	75	10.1	204	56	180	112	0	0		0	0	-3.52941		6	2	16
348	T2DM	0	48	0	Primary	Former smoker	Sedentary	6	No DR	0	1	92	32.52	128	87	7	185	46	108	117.4	1	0		1	-1	-1.26316		2	1	28
351	T2DM	0	60	1	Secondary	Non smoker	Regular physical activity	1	DR	0	0	126	38.7	140	83	7.8	227	34	220	149	0	1		1	0	-0.588235		3	0	34
352	T2DM	0	71	1	< Primary	Non smoker	Sedentary	39	DR	1	0	122	33.85	149	76	8.2	167	47	168	86.4	1	0		-2	-2	-1.0625		4	5	32
353	T2DM	0	55	1	Graduate or higher	Former smoker	Sedentary	6	No DR	1	0	137	47.47	148	70	7.3	186	64	93	103.4	0	0		1	0	-0.529412		3	2	21
354	T2DM	0	63	1	Primary	Non smoker	Regular physical activity	11	No DR	1	1	112	33.98	129	69	9.8	208	64	113	121.4	0	0		1	0	-0.5		0	0	27
355	T2DM	0	68	1	< Primary	Non smoker	Sedentary	38	DR	0	1					9.1	164	55	83	92.4	1	0		-1	-2	-4.13333		6	6	28
356	T2DM	0	52	1	Primary	Non smoker	Regular physical activity	12	DR	1	0	101	29.92	146	74	7.3	214	49	93	146.4	1	0		1	0	-0.888889		0	0	29
358	T2DM	0	47	0	Graduate or higher	Former smoker	Regular physical activity	1	DR	0	1	105	28.86	142	78	6.4	139	48	107	69.6	0	0		0	0	-0.263158		4	2	30
360	T2DM	0	50	0	Secondary	Former smoker	Regular physical activity	19	DR	0	0	101	28.49	117	67	7.3	179	67	65	99	1	0		2	1	-0.526316		2	0	29
361	T2DM	0	55	0	Graduate or higher	Former smoker	Regular physical activity	10	DR	1	1	102	28.86	139	70	7.3	178	46	110	110	0	0		0	-2	-2.15789		4	0	32
363	T2DM	0	69	1	Primary	Non smoker	Regular physical activity	30	DR	1	0	93	26.67	170	80	9.6	245	79	64	153.2	1	0		0	0	-0.176471		2	0	34
364	T2DM	0	50	1	< Primary	Non smoker	Regular physical activity	5	DR	1	0	105	34.46	113	87	7.2	204	73	85	114	0	0		1	-1	-1.31579		5	3	30
367	T2DM	0	59	1	< Primary	Former smoker	Regular physical activity	12	No DR	0	1	113	32.62	118	75	8.8	190	49	65	128	1	0		2	-1	-3.36842		4	0	16
370	T2DM	0	49	0	Primary	Current smoker	Sedentary	4	DR	1	0	119	34.33	143	81	5.4	145	72	74	58.2	0	0		0	0	-0.235294		1	1	29
371	T2DM	0	71	1	Primary	Non smoker	Regular physical activity	5	DR	1	1	108	32.38	132	64	7.1	161	43	153	87.4	1	0		3	0	-0.1875		2	1	33
372	T2DM	0	65	1	< Primary	Current smoker	Sedentary	1	No DR	0	0	99	29.99	113	68	6.4	273	60	190	175	0	0		1	-2	-0.882353		2	0	15
373	T2DM	0	54	1	Secondary	Non smoker	Sedentary	9	DR	0	0	113	32.83	134	73	9.7	178	83	54	84.2	1	0		1	-2	-1.31579		5	3	32
374	T2DM	0	75	1	Primary	Non smoker	Regular physical activity	28	DR	0	0	98	24.48	136	85	8.2	205	57	111	125.8	1	1		2	0	-0.222222		4	4	30
375	T2DM	0	42	0	Secondary	Current smoker	Sedentary	7	No DR	0	0	97	25.59	132	71	6.9	165	60	63	92.4	1	0		2	-3	-1.68421		0	5	24
376	T2DM	0	75	1	< Primary	Non smoker	Regular physical activity	15	DR	1	0	105	28.87	195	91	8.3	173	69	102	83.6	1	1		0	-1	-2.26667		0	5	23
377	T2DM	0	60	1	Primary	Non smoker	Regular physical activity	8	No DR	1	1	110	29.82	137	79	8.1	215	60	289	111	0	1		1	-1	-0.352941		0	0	34
378	T2DM	0	74	1	< Primary	Non smoker	Regular physical activity	10	DR	0	1	113	40.77	139	78	7	230	56	300	130	0	0		0	0	-0.222222		1	0	33
379	T2DM	0	56	1	Primary	Non smoker	Sedentary	5	No DR	1	1	120	36.96	127	91	7	221	62	122	134.6	0	0		0	0	-0.411765		2	0	33
380	T2DM	0	50	0	Secondary		Regular physical activity	8	DR	0	1	110	30.41	144	97	8.1	150	53	101	76.8	0	0		1	0	-0.0526316		0	0	31
381	T2DM	0	64	1	Primary	Non smoker	Sedentary	8	DR	0	1	108	33.69	133	74	7	175	45	123	105.4	0	1		1	-1	-1.125		6	0	15
383	T2DM	0	54	1	Primary	Current smoker	Regular physical activity	27	DR	1	1	121	39.55	112	67	9.7	148	48	65	87	1	0		0	-2	-1.6		5	1	31
385	T2DM	0	60	1	Primary	Former smoker	Regular physical activity	21	DR	0	0	101	33.27	164	71	10.8	193	55	131	111.8	1	0		0	-1	-1.11111		5	6	33
387	T2DM	0	75	1	< Primary	Non smoker	Sedentary	50	DR	1	1	119	35.84	158	73	9	242	59	141	154.8	1	0		-2	-1	-1.6875		6	2	15
389	T2DM	0	41	1	Secondary	Non smoker	Regular physical activity	2	No DR	0	1	101	28.16	141	83	8.7	320	54	171	231.8	0	1		0	0	-0.947368		5	2	36
391	T2DM	0	67	1	Primary	Non smoker	Sedentary	10	DR	1	1	130	43.09	171	75	8.1	170	65	85	88	0	0		1	-1	-0.470588		2	2	21
392	T2DM	0	61	1	Primary	Non smoker	Regular physical activity	13	DR	1	1	90	28.31	115	59	10.2	160	64	74	71.2	0	0		1	-2	-0.333333		5	0	27
393	T2DM	0	50	1	Primary	Former smoker	Regular physical activity	22	DR	0	1	116	36.18	153	81	11.4	193	56	116	113.8	1	0		0	0	-0.588235		3	2	24
397	T2DM	0	64	1	< Primary	Current smoker	Sedentary	10	DR	0	1	103	29.36	108	76		181	52	137	101.6	0	0		0	-2	-3.68421		5	3	31
399	T2DM	0	62	1	< Primary	Non smoker	Regular physical activity	34	DR	0	0	97	32.5	130	63				172		1	1		0	-1	-0.882353		0	0	33
400	T2DM	0	70	1	< Primary	Non smoker	Regular physical activity	14	DR	1	0	116	36.03	129	68	8.9	192	50	146	112.8	1	0		0	-2	-2.52941		6	0	21
401	T2DM	0	75	1	< Primary	Non smoker	Regular physical activity	20	DR	1	0	110	30.88	172	80	11.8	232	61	129	145.2	1	1		1	-3	-0.705882		5	1	31
403	T2DM	0	66	1	Primary	Non smoker	Regular physical activity	24	No DR	1	0	104	30.33	136	62	7.8	204	52	109	130.2	0	0		1	-1	-0.611111		5	0	30
3	T1DM	1	39	0	Graduate or higher	Non smoker	Regular physical activity	23	No DR	0	0	75	24.8	12	8	6.2	174	69	46	95.8	1	0		2	-1	-1.78947		1	3	33
4	T1DM	1	34	0	Secondary	Non smoker	Regular physical activity	21	DR	0	0	92	24.6	127	71	8.3	167	54	67	99.6	1	0		1	0	-0.722222		2	1	29
5	T1DM	1	37	0	Graduate or higher	Non smoker	Sedentary	14	No DR	0	0	100	28.4	13	7	6.3	162	50	56	100	1	0		1	-1	-0.578947		1	5	23
6	T1DM	1	32	1	Graduate or higher	Non smoker	Regular physical activity	4	No DR	0	0	71	24.2	11	7	6	215	92	103	102.4	1	0		2	-1	-0.473684		1	2	23
7	T1DM	1	49	1	Graduate or higher	Non smoker	Regular physical activity	26	No DR	1	1	72	22.6	123	71	8	237	80	72	142.6	1	0		1	-1	-2.05263		6	6	25
8	T1DM	1	27	1	Secondary	Non smoker	Sedentary	20	No DR	0	0	75	26	124	60	7.6	223	76	83	130	1	0		0	-1	-1.05556		5	4	31
9	T1DM	1	31	0	Graduate or higher	Non smoker	Regular physical activity	17	No DR	0	0	85	22.7	101	61	8.1	172	69	39	95.2	1	1		1	-1	-0.526316		4	2	27
10	T1DM	1	38	1	Primary	Non smoker	Sedentary	31	DR	0	0	80	22.6	100	59	8.6	182	58	46	114.8	1	0		1	0	-1.27778		4	4	32
12	T1DM	1	22	0	Secondary	Non smoker	Regular physical activity	4	No DR	0	0	87	24.7	122	63	6.7	148	48	58	88.4	1	0		2	-1	0.166667		1	2	28
13	T1DM	1	37	1	Secondary	Former smoker	Sedentary	25	No DR	0	0		37.7	135	75	6.4	176	71	57	93.6	1	1		2	-1	-1.42105		5	1	31
14	T1DM	1	38	1	Secondary	Current smoker	Regular physical activity	5	No DR	0	0	75	24.5	110	62	7.3	149	46	55	92	1	1		1	-2	-1.72222		1	5	31
16	T1DM	1	22	0	Secondary	Current smoker	Sedentary	4	No DR	0	0	79	19.4	120	70	7.8	136	56	43	71.4	1	0		3	-1	0		4	2	31
17	T1DM	1	31	1	Secondary	Current smoker	Regular physical activity	25	DR	0	0	94	29.8	12	7	9.4	213	42	108	149.4	1	0		0	-2	-2.47368		5	5	22
18	T1DM	1	29	1	Graduate or higher	Non smoker	Regular physical activity	24	No DR	0	0	71	24	110	75	8.5	225	81	49	134.2	1	0		0	0	-0.947368		1	3	35
19	T1DM	1	25	1	Secondary	Non smoker	Sedentary	2	No DR	0	0	60	16.4	10	6	6.1	140	56	68	70.4	1	0		1	-1	-1.22222		5	5	21
20	T1DM	1	51	0	Graduate or higher	Current smoker	Sedentary	15	DR	0	0	98	29.8	143	80	8.7	182	59	117	99.6	1	0		2	-3	-3.52632		1	2	34
22	T1DM	1	30	0	Secondary	Non smoker	Sedentary	18	No DR	0	0	109	30.5	125	67	9.4	202	48	195	115	1	0		1	-2	-0.631579		3	2	26
23	T1DM	1	34	0	Secondary	Current smoker	Regular physical activity	27	DR	0	0	77	23.9	10	6	7.2	200	57	56	131.8	1	1		2	0	-0.333333		4	5	34
24	T1DM	1	39	1	Secondary	Former smoker	Regular physical activity	19	No DR	0	0	74	19.4	105	65	6.9	183	85	32	91.6	1	0		2	0	-0.947368		4	5	29
26	T1DM	1	34	1	Secondary	Former smoker	Regular physical activity	9	No DR	0	0	74	22.1	10	8	7.2	194	71	57	111.6	1	0		0	0	-0.588235		5	5	29
27	T1DM	1	43	1	Secondary	Non smoker	Regular physical activity	38	DR	1	0	76	22.6	134	74	8.5	187	65	85	105	1	0		2	-1	-2.35294		2	2	27
28	T1DM	1	20	1	Secondary	Non smoker	Regular physical activity	14	No DR	0	0	65	19.1	106	63	7.6	162	62	41	91.8	1	0		2	-1	-0.666667		1	1	28
29	T1DM	1	39	1	Primary	Non smoker	Sedentary	32	DR	0	0	83	25.6	119	69	7	174	63	49	101.2	1	0		1	-1	-1.63158		2	3	29
30	T1DM	1	20	1	Secondary	Former smoker	Sedentary	17	No DR	0	0	61	18	102	55	7.5	171	53	64	105.2	1	0		1	0	-1.55556		5	3	28
31	T1DM	1	20	0	Secondary	Non smoker	Regular physical activity	4	No DR	0	0	83	23.1	128	76	7.8	148	52	52	85.6	1	0		1	-1	-0.411765		4	1	20
101	T1DM	1	42	0	Graduate or higher	Non smoker	Sedentary	16	No DR	0	1	98	24.3	112	74	7.6	169	52	73	102.4	1	0		0	-2	-3.36842		4	1	22
102	T1DM	1	56	1	< Primary	Non smoker	Regular physical activity	15	No DR	1	1	101	26.3	132	76	7.2	164	61	59	91.2	1	0		1	-1	-1.11765		3	2	14
103	T1DM	1	21	0	Primary	Non smoker	Regular physical activity	3	No DR	0	0		22.1	106	58	7.9		54	77	93.6	1	0		1	1	-2.23529		4	2	24
104	T1DM	1	36	0	Primary	Former smoker	Sedentary	1	No DR	0	0		20.4	114	73	10.7	195	58.9	78	121.4	1	0		2	-1	-0.842105		2	3	30
105	T1DM	1	33	1	Secondary	Current smoker	Sedentary	1	No DR	0	0	72	19.6	116	71	6.1	171	79	39	84.2	1	0		2	-1	-0.947368		0	1	30
106	T1DM	1	26	1	< Primary	Non smoker	Sedentary	12	No DR	0	0	72	22.2	148	65	8.6	190	88	66	88.8	1	0		0	-1	-1.83333		6	1	23
107	T1DM	1	77	0	< Primary	Current smoker	Regular physical activity	21	No DR	1	1	97	24.5	167	75	6.9	251.3	53.4	84.9	180.8	1	0		2	-2	-3.77778		6	2	25
108	T1DM	1	47	1	Secondary	Former smoker	Regular physical activity	18	No DR	0	0	82	28.2	133	83	9.2	224	64	63	147.4	1	0		1	-2	-1.78947		2	2	31
109	T1DM	1	58	0	Secondary	Non smoker	Regular physical activity	32	DR	1	1	94	24.7	184	91	9.2	244	64	211	137.8	1	1		0	-3	-4.11765		5	4	17
110	T1DM	1	45	0	Secondary	Non smoker	Regular physical activity	31	DR	1	1	88	26.2	130	74	7.8	172	46	103	105.4	1	0		1	0	-1.05263		2	2	22
111	T1DM	1	63	1	< Primary	Non smoker	Regular physical activity	10	No DR	1	1	90	26	145	80	9.5	160	86	54	63.2	1	0		1	-1	-2.16667		5	5	30
112	T1DM	1	23	0	Secondary	Non smoker	Regular physical activity	21	No DR	0	0		28.5	135	80	6.8	171	57	74	99.2	1	0		1	0	-0.789474		2	2	30
113	T1DM	1	75	1	< Primary	Former smoker	Sedentary	21	DR	1	1	96	26.6	188	73	9.1	214	79	74	120.2	1	0		1	-2	-4.8125		4	3	30
114	T1DM	1	40	1	Graduate or higher	Non smoker	Sedentary	30	DR	1	0	87	28	116	64	8	144	58	53	75.4	1	0		1	0	-1.23529		4	3	32
115	T1DM	1	50	1	Graduate or higher	Non smoker	Regular physical activity	39	DR	0	1	71	20	114	72	8	231	81	110	125	1	0		1	-2	-3.05556		3	3	21
116	T1DM	1	43	1	< Primary	Current smoker	Regular physical activity	12	No DR	1	1	108	33.4	158	101	7	261	60	118	177.4	1	1		1	-1	-1.33333		2	2	25
117	T1DM	1	40	1	Secondary	Former smoker	Regular physical activity	22	No DR	0	1	112	37.1	131	89	7.1	144	41	142	74.6	1	0		0	-2	-1.63158		3	4	15
118	T1DM	1	51	1	< Primary	Non smoker	Regular physical activity	42	DR	0	1	81	22.1	148	75	8.3	229	108	46	112.8	1	0		0	-1	-1.64706		5	6	27
119	T1DM	1	48	0	Primary	Former smoker	Sedentary	6	No DR	1	1	83	22.2	119	79	8.1	120	90	84	107.2	1	0		-1	-1	-2.13333		5	3	7
120	T1DM	1	54	0	Graduate or higher	Former smoker	Regular physical activity	7	No DR	0	0	75	21.3	121	75	7.3	168	68	71	85.8	1	0		0	-2	-2.61111		2	2	23
121	T1DM	1	25	0	Secondary	Non smoker	Regular physical activity	18	No DR	0	0	87	24.9	127	75	7.2	215	74	88	123.4	1	0		1	0	-1.16667		4	2	30
122	T1DM	1	39	1	Secondary	Current smoker	Regular physical activity	14	No DR	0	0	90	21.6	109	69	7.4	206	74	85	115	1	0		0	0	-1.47368		3	3	28
123	T1DM	1	26	1	Graduate or higher	Non smoker	Sedentary	15	No DR	0	0	75	20.5	110	74	6.7	166	64	56	90.8	1	0		2	-1	-0.210526		5	5	28
124	T1DM	1	49	0	Secondary	Current smoker	Regular physical activity	17	No DR	0	1	106	31.8	142	74	7.4	174	79	57	83.6	1	0		1	-2	-1.78947		2	3	33
125	T1DM	1	50	0	Graduate or higher	Former smoker	Regular physical activity	6	No DR	0	0	94	22.3	120	74	7.2	203	75	71	113.8	1	0		-1	-2	-1.42105		0	0	20
126	T1DM	1	67	1	< Primary	Non smoker	Sedentary	41	No DR	1	1	84	24.2	157	73	7.4	163	61	57	90.6	1	0		0	-3	-1.70588		4	3	20
127	T1DM	1	49	0	Secondary	Current smoker	Regular physical activity	34	DR	1	1	94	27.8	108	50	7.3	140	61	45	70	1	0		0	-2	-3.78947		4	3	34
128	T1DM	1	52	1	< Primary	Non smoker	Regular physical activity	24	No DR	1	1		26	136	84	8.6	215	57	81	141.8	1	0		0	-3	-1.44444		0	0	27
129	T1DM	1	60	0	Secondary	Non smoker	Regular physical activity	37	DR	1	1	89	22.2	168	57	6.8	171	91	36	72.8	1	0		1	0	-0.588235		4	2	30
130	T1DM	1	57	0	Secondary	Non smoker	Regular physical activity	39	DR	0	0	120	33.2	117	77	6.9	202	76	80	110	1	0		0	-2	-1.36842		3	3	36
131	T1DM	1	69	0	Secondary	Non smoker	Regular physical activity	35	DR	1	1	105	29.4	147	65	8.2	169	71	72	83.6	1	0		0	-2	-1.88235		0	1	32
132	T1DM	1	38	0	Graduate or higher	Current smoker	Sedentary	18	No DR	0	0	90	25.5	110	73	8	202	73	66	115.8	1	0		1	-1	-2.42105		5	1	31
133	T1DM	1	38	0	Primary	Current smoker	Regular physical activity	7	No DR	0	0	96	24.2	128	77	7.3	169	45	44	115.2	1	0		1	0	-0.352941		3	1	29
134	T1DM	1	55	1	Graduate or higher	Non smoker	Regular physical activity	14	No DR	0	0	76	20.8	141	85	6.4	194	82	47	102.6	1	0		2	-1	-2.05263		3	3	29
135	T1DM	1	66	1	< Primary	Non smoker	Regular physical activity	36	No DR	0	0	79	23.8	132	68	7.9	205	93	57	100.6	1	0		-1	-3	-5.5625		3	3	16
136	T1DM	1	67	0	Secondary	Current smoker	Regular physical activity	35	DR	1	1	90	24	135	61	7.9	144	48	79	80.2	1	0		1	0	0		3	1	31
137	T1DM	1	39	1	Graduate or higher	Current smoker	Regular physical activity	7	No DR	0	0	92	26.6	115	62	7.8	205	75	68	116.4	1	0		1	-2	-1.68421		3	3	15
138	T1DM	1	70	1	< Primary	Former smoker	Sedentary	33	DR	0	1	78	24.3	129	56	8.1	220	113	56	94.8	1	0		-1	-1	-3.52941		3	5	29
139	T1DM	1	50	0	Primary	Former smoker	Regular physical activity	18	DR	1	1	96	27	147	79	6.6	121	35	68	72.4	1	0		1	0	-0.888889		3	1	32
140	T1DM	1	55	0	Secondary	Non smoker	Regular physical activity	34	DR	1	1	84	24.6	126	74	6.9	192	64	40	120	1	0		1	-2	-2.10526		3	2	25
141	T1DM	1	57	1	< Primary	Current smoker	Sedentary	22	DR	1	1	94	25.6	120	81	7.8	172	65	201	66.8	1	0		-1	-2	-3.05882		5	5	14
142	T1DM	1	61	1	< Primary	Former smoker	Regular physical activity	35	DR	1	1	103	30.1	161	83	9.1	212	64	140	120	1	0		1	-1	-1.83333		4	4	34
143	T1DM	1	46	1	Secondary	Current smoker	Sedentary	23	No DR	0	1	67	23.7	111	82	6.6	167	55	54	101.2	1	0		3	-1	-0.578947		2	6	32
144	T1DM	1	33	1	< Primary	Non smoker	Regular physical activity	22	DR	0	0	65	26	113	77	10.6	205	79	78	110.4	1	0		1	1	-0.222222		5	0	36
145	T1DM	1	45	0	Secondary	Non smoker	Regular physical activity	39	DR	1	1	120	38.2	154	69	7.2	160	58	59	90.2	1	0		1	-1	-0.526316		3	3	32
146	T1DM	1	70	0	Secondary	Former smoker	Regular physical activity	50	No DR	1	0	90	25.8	170	69	6.7	188	66	74	107.2	1	0		1	-2	-2.22222		3	2	33
147	T1DM	1	41	1	Primary	Former smoker	Regular physical activity	30	DR	0	0	81	24.9	136	80	7.3	140	51	81	72.8	1	0		1	-2	-2.84211		4	3	28
148	T1DM	1	53	1	Primary	Former smoker	Regular physical activity	14	No DR	0	1	105	28	126	69	8.5	199	63	65	123	1	0		1	-1	-2.52632		4	0	27
149	T1DM	1	36	1	Primary	Current smoker	Regular physical activity	10	No DR	0	0	110	33.4	138	83	7	167	73	65	81	1	1		2	-1	-0.125		3	4	35
150	T1DM	1	44	1	Secondary	Current smoker	Regular physical activity	35	DR	0	0	82	25.8	112	69	7	200	54	94	127.2	1	0		1	0	-0.368421		4	4	35
151	T1DM	1	54	0	Secondary	Former smoker	Regular physical activity	9	No DR	1	1	106	28.9	134	79	7.8	170	52	117	94.6	1	0		1	0	-0.833333		5	2	35
152	T1DM	1	43	0	Secondary	Current smoker	Sedentary	15	No DR	0	0	108	30.5	139	77	6.6	201	57	91	125.8	1	0		1	-1	-1.27778		2	1	31
153	T1DM	1	33	1	Graduate or higher	Non smoker	Regular physical activity	32	No DR	0	0	67	18.2	119	81	7.6	149	62	51	76.8	1	0		2	-2	-3.36842		1	5	30
154	T1DM	1	50	1	Primary	Former smoker	Regular physical activity	18	DR	0	1	95	23.5	139	72	7.6	214	63	93	132.4	1	0		-1	-1	-2.29412		2	6	28
156	T1DM	1	45	1	Primary	Non smoker	Regular physical activity	14	DR	0	1	92	24.4	134	67	7.6	168	57	64	98.2	1	0		0	0	-1.16667		3	2	26
157	T1DM	1	51	0	Secondary	Current smoker	Sedentary	39	DR	1	1	107	30.1	126	77	7.4	124	39	41	76.8	1	0		0	-3	-4.44444		2	2	20
158	T1DM	1	53	1	Primary	Non smoker	Regular physical activity	9	No DR	0	1	74	19.3	119	59	6.7	213	91	48	112.4	1	0		1	-1	-1.63158		2	4	33
159	T1DM	1	29	0	Secondary	Former smoker	Sedentary	16	No DR	0	0	90	24.2	117	62	8.6	151	65	77	70.6	1	0		0	-1	-2.05263		2	2	25
160	T1DM	1	46	1	Primary	Non smoker	Regular physical activity	32	DR	1	0	78	20.5	157	66	8.4	169	56	42	104.6	1	1		0	-2	-2.10526		6	6	28
161	T1DM	1	52	1	Primary	Current smoker	Regular physical activity	43	No DR	0	1	90	21.6	137	76	6.9	202	85	71	102.8	1			1	-2	-2.5		3	4	28
162	T1DM	1	71	0	Secondary	Former smoker	Regular physical activity	25	DR	1	1	120	30.7	167	68	6.3	168	53	94	96.2	1	0		1	-2	-1.38889		3	3	30
163	T1DM	1	48	1	Primary	Current smoker	Sedentary	6	No DR	0	1	103	30.1	113	74	8.1	155	53	74	87.2	1	0		1	-3	-5.52941		4	2	33
164	T1DM	1	47	0	Graduate or higher	Current smoker	Regular physical activity	23	No DR	1	1	102	27.7	123	72	7.2	167	51	61	103.8	1	0		1	-1	-1.38889		5	4	28
165	T1DM	1	48	0	Primary	Non smoker	Sedentary	10	No DR	1	1	96	26.5	132	81	7	182	66	64	103.2	1	0		0	-2	-3.73684		5	4	18
166	T1DM	1	41	1	Primary	Non smoker	Regular physical activity	15	No DR	0	0	77	26.5	112	67	7.7	187	72	48	105.4	1	0		1	0	-0.222222		2	1	30
167	T1DM	1	50	1	Secondary	Former smoker	Regular physical activity	21	No DR	0	0	83	20.4	109	71	6.7	169	67	61	89.8	1	0		-1	-1	-3.26316		3	3	17
168	T1DM	1	39	1	Graduate or higher	Current smoker	Regular physical activity	15	No DR	0	0	85	25.8	112	74	6.8	170	85	68	71.4	1	0		1	-1	-0.947368		2	2	32
169	T1DM	1	44	1	Primary	Non smoker	Sedentary	16	No DR	0	1	91	28.2	133	86	7.8	257	65	70	178	1	0		-1	-2	-5		3	3	21
170	T1DM	1	50	1	Secondary	Current smoker	Regular physical activity	19	DR	1	0	75	21.2	123	62	8.9	166	58	88	90.4	1	1		1	-3	-6.52632		3	3	22
171	T1DM	1	31	1	Secondary	Former smoker	Sedentary	30	DR	1	0	79	24.5	94	66	8	135	51	43	75.4	1	0		2	-3	-4.73684		4	1	22
172	T1DM	1	44	0	Secondary	Current smoker	Regular physical activity	20	No DR	0	1	99	26.5	129	82	7.5	188	68	65	107	1	0		1	-1	-0.368421		1	2	31
173	T1DM	1	42	0	Secondary	Former smoker	Sedentary	29	DR	0	0	82	21.5	98	60	5.9	201	61	43	131.4	1	0		-3	-2	-4.72222		3	3	30
174	T1DM	1	36	0	Secondary	Non smoker	Regular physical activity	22	DR	0	1	103	29.1	150	89	7	164	50	67	100.6	1	0		2	-3	-1.73684		3	1	29
175	T1DM	1	58	1	< Primary	Non smoker	Regular physical activity	18	No DR	0	1	81	23.6	140	82	6.3	164	58	49	96.2	1	0		0	0	-0.222222		3	3	36
176	T1DM	1	59	1	Primary	Non smoker	Regular physical activity	26	DR	0	0	76	23.6	137	67	7.1	211	114	53	86.4	1	0		1	-1	-1.625		3	3	35
177	T1DM	1	42	0	Secondary	Former smoker	Regular physical activity	12	DR	0	1	97	26.6	128	74	11	197	38	311	145	1	0		-1	-2	-3.31579		4	5	26
178	T1DM	1	49	0	Graduate or higher	Former smoker	Regular physical activity	21	No DR	0	1	85	24.6	150	93	6.9	194	57	124	112.2	1	0		2	0	-1.26316		2	2	28
179	T1DM	1	51	0	Primary	Non smoker	Sedentary	33	DR	0	1	100	27.1	145	77	7.6	220	65	61	142.8	1	0		1	0	-0.5		3	3	34
180	T1DM	1	52	0	Secondary	Non smoker	Regular physical activity	23	No DR	0	1	101	29.9	132	86	6.9	169	47	72	107.6	1	0		3	-3	-0.947368		2	2	22
181	T1DM	1	38	0	Graduate or higher	Former smoker	Regular physical activity	5	DR	0	0	106	33.6	119	69	7.1	196	41	277	136	1	0		1	-2	-1.52632		5	1	19
182	T1DM	1	49	1	Secondary	Former smoker	Sedentary	33	DR	1	0	86	25.7	129	77	8.2	154	52	52	91.6	1	1		1	-2	-3.05263		4	3	19
183	T1DM	1	56	1	Primary	Current smoker	Regular physical activity	29	No DR	0	1	80	24.1	98	66	7.8	185	70	55	104	1	0		1	-2	-2.11111		4	5	24
184	T1DM	1	62	0	Secondary	Former smoker	Regular physical activity	19	No DR	1	1	82	19.1	128	69	8	164	57	99	87.2	1	0		1	-2	-1.88889		4	3	21
185	T1DM	1	52	0	Primary	Former smoker	Regular physical activity	15	No DR	0	1	94	27.3	119	73	7.2	226	70	54	145.2	1	0		1	-1	-1.36842		3	3	22
186	T1DM	1	46	0	Graduate or higher	Current smoker	Regular physical activity	16	No DR	0	0	96	25.6	135	70	7	210	53	82	140.6	1	0		1	-1	-0.842105		4	0	30
187	T1DM	1	48	1	< Primary	Current smoker	Sedentary	33	DR	1	1	92	23.9	145	78	6.7	188	47	125	116	1			-3	-3	-4.83333		2	5	19
188	T1DM	1	46	1	Secondary	Former smoker	Regular physical activity	2	No DR	0	0	83	24.2	123	69	8.1	193	107	42	77.6	1			2	1	-1.42105		3	1	25
189	T1DM	1	60	0	Primary	Former smoker	Regular physical activity	18	No DR	1	1	89	22.1	139	89	7.5	151	63	54	77.2	1	0		1	-1	-1.16667		4	2	35
190	T1DM	1	35	0	Secondary	Former smoker	Regular physical activity	1	No DR	0	0		23.6	136	88	5.8	155	52	69	89.2	1	0		2	0	-0.894737		1	4	29
191	T1DM	1	73	1	< Primary	Non smoker	Regular physical activity	21	DR	1	1	70	22.5	124	57	7.7	196	71	73	110.4	1	0		0	-1	-0.941176		4	4	21
192	T1DM	1	35	0	Primary	Current smoker	Regular physical activity	27	No DR	0	0	79	21.8	108	62	7.7	163	77	36	78.8	1	0		0	-2	-1.66667		3	3	34
193	T1DM	1	37	0	Secondary	Former smoker	Regular physical activity	19	No DR	0	0	90	30.3	122	80	8	158	53	64	92.2	1	0		0	-3	-3.73684		4	3	15
194	T1DM	1	48	0	Secondary	Former smoker	Regular physical activity	20	DR	1	1	97	27.7	163	87	8.6	181	50	113	108.4	1	1		0	-2	-1.66667		3	2	22
195	T1DM	1	49	0	Primary	Non smoker	Regular physical activity	28	DR	0	0	77	22.3	170	83	7.1	208	87	53	110.4	1	0		1	0	-0.736842		3	3	26
196	T1DM	1	55	1	Primary	Non smoker	Regular physical activity	24	DR	1	1	90	25.1	176	80	8.7	189	55	55	123	1	0		1	-2	-2.27778		4	2	20
197	T1DM	1	74	1	Primary	Non smoker	Regular physical activity	44	DR	1	1	77	23.4	177	74	7.8	220	55	155	134	1	0		2	-3	-1.94118		4	4	31
198	T1DM	1	52	1	Primary	Former smoker	Regular physical activity	32	DR	0	0	80	25.1	91	60	8.4	190	88	57	90.6	1	0		0	0	-1		5	6	29
199	T1DM	1	77	1	Primary	Non smoker	Regular physical activity	42	DR	1	0	86	22.5	148	62	7.7	182	66	80	100	1	0		1	-2	-0.941176		3	1	31
200	T1DM	1	54	1	Primary	Non smoker	Regular physical activity	43	DR	1	0	91	27.1	146	72	5.7	202	79	49	113.2	1	0		1	0	-0.111111		3	3	29
